# Supplementary figures and images for: Impact of temperature-dependent non-PAN peroxynitrate formation, RO2NO2, on nighttime atmospheric chemistry
Source: Royal Society of Chemistry journal article supplement (doi:10.1039/d3cp04163h), 2024-01-01

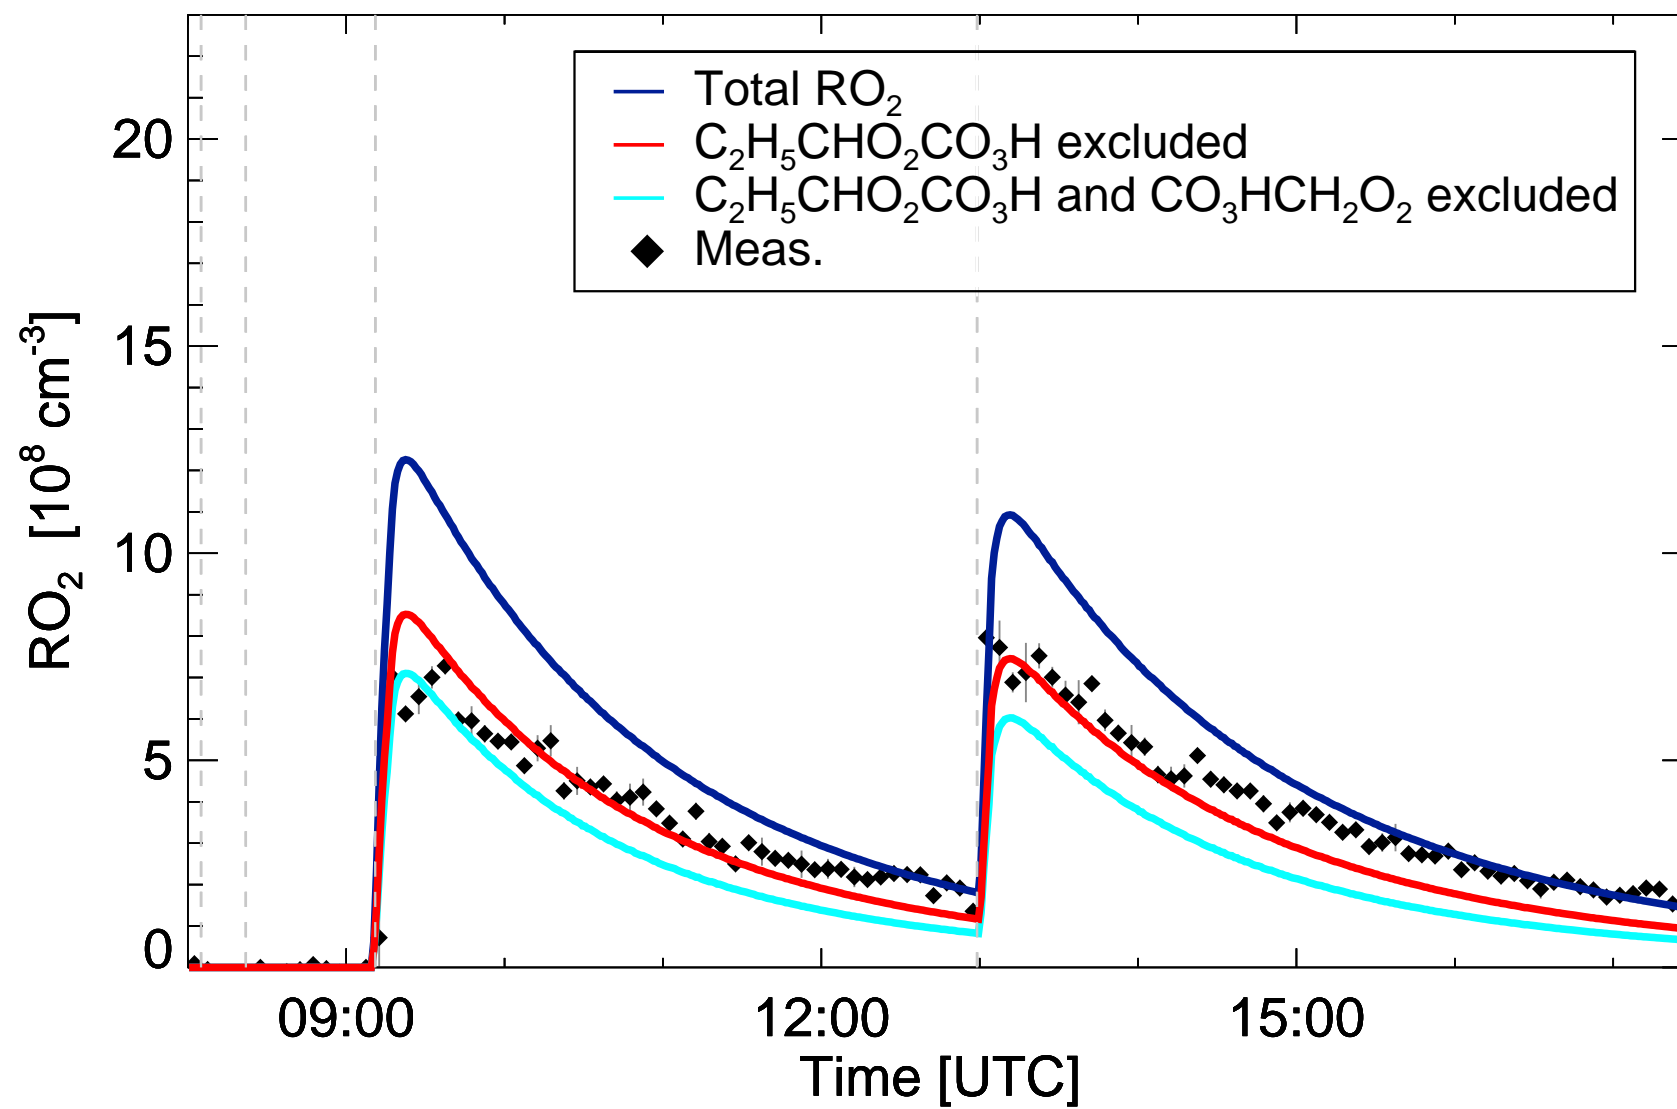

Supplement: d3cp04163h1.zip [file d3cp04163h1.zip]

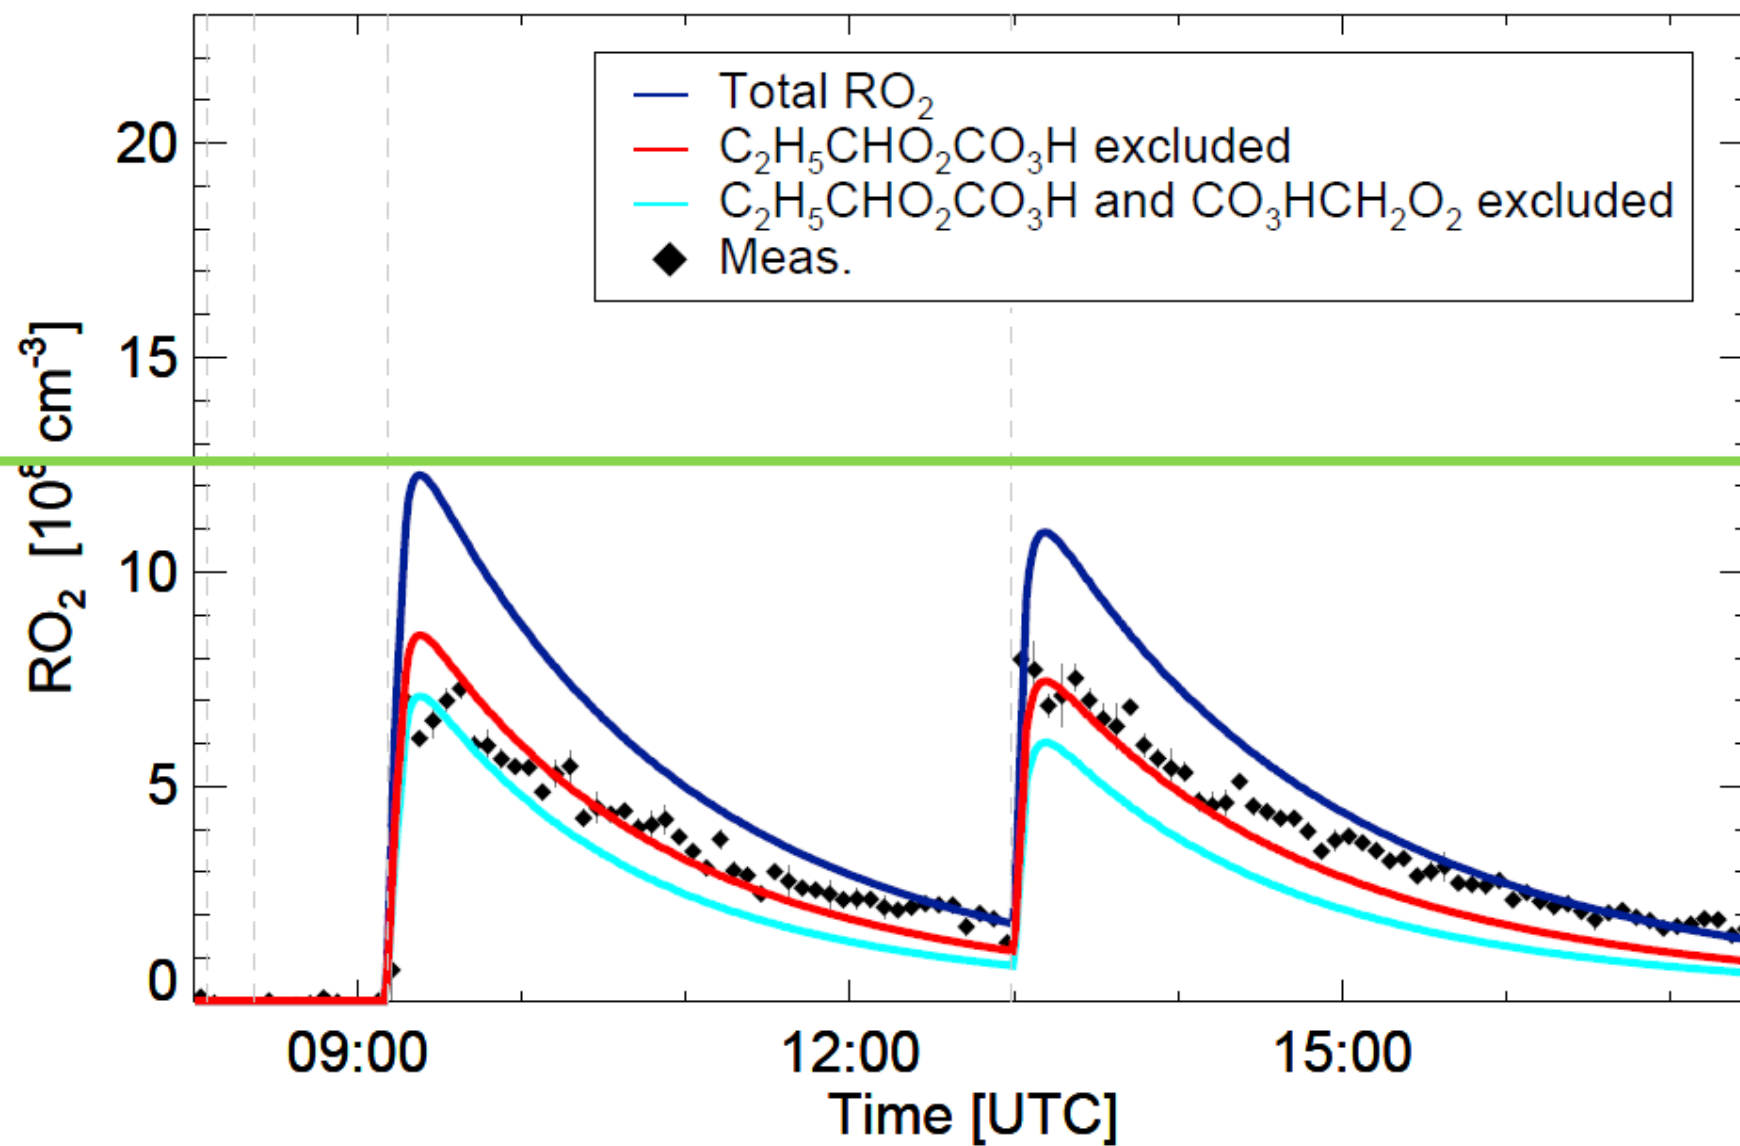

Supplement: d3cp04163h1.zip [file d3cp04163h1.zip]

- ◆ Meas. - NO<sub>3</sub> interference (this study)
- ◆ Meas. - NO<sub>3</sub> interference (Fuchs et al., 2016)
- ◆ Meas.

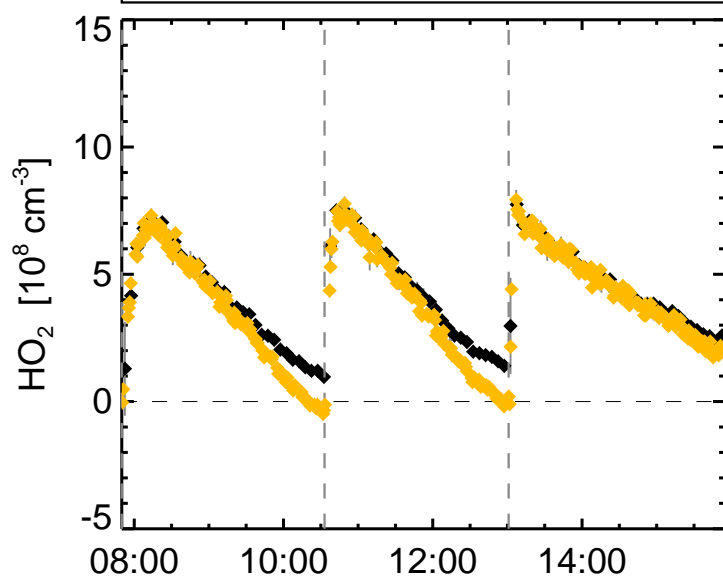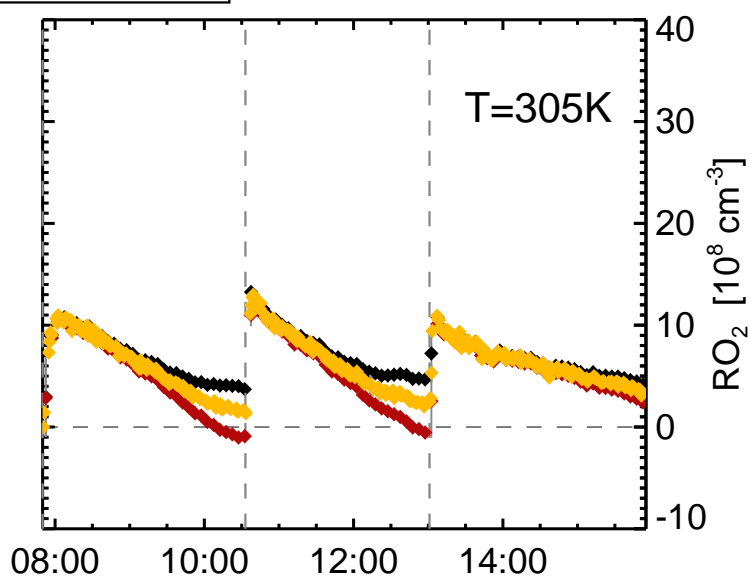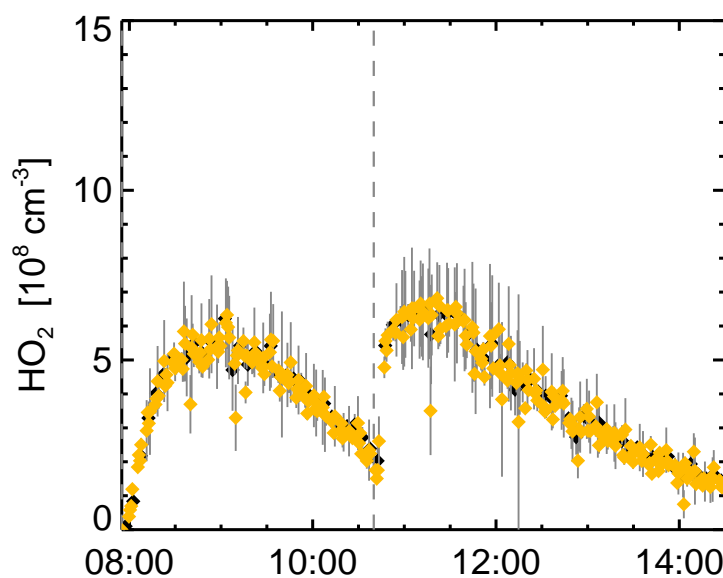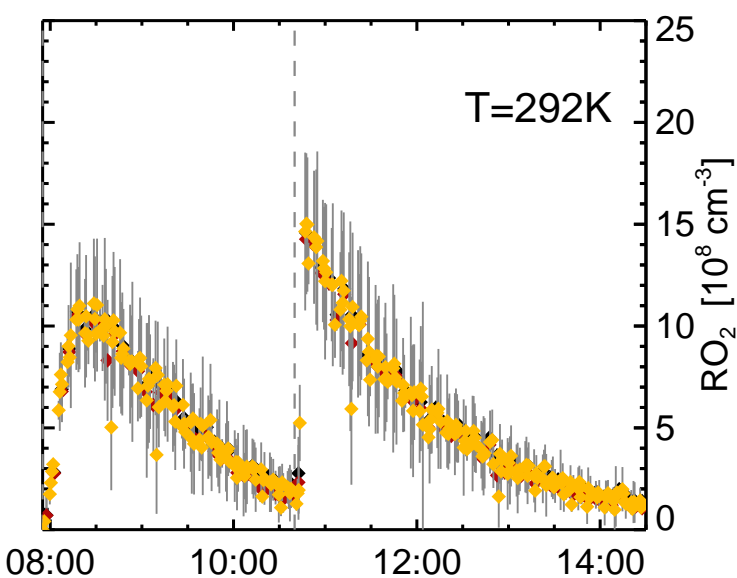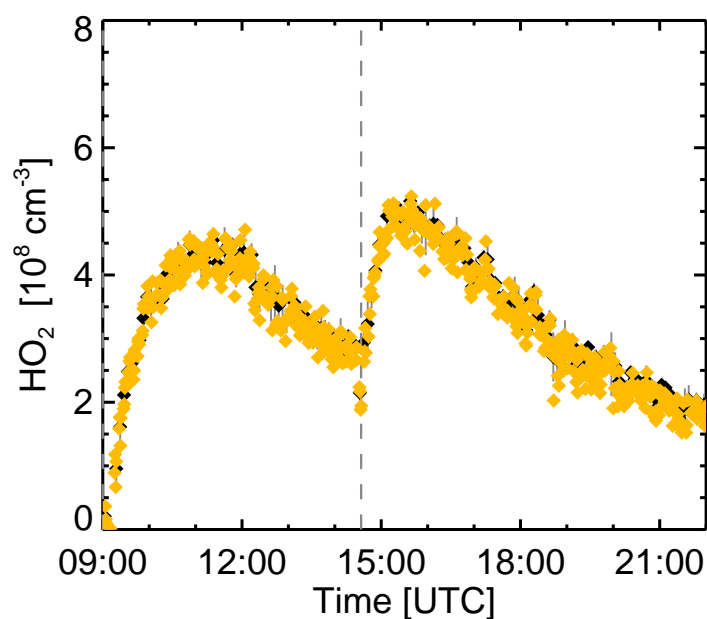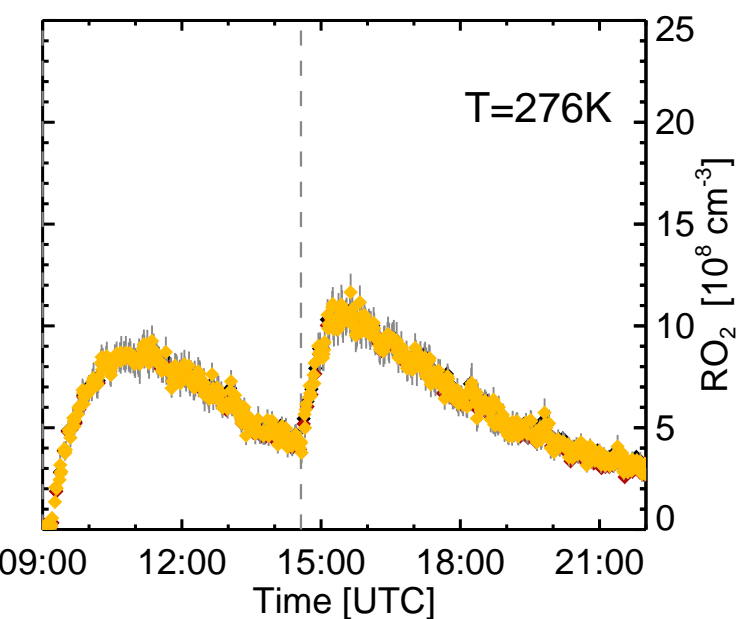

Supplement: d3cp04163h1.zip [file d3cp04163h1.zip]

— Total RO<sub>2</sub>    — C<sub>2</sub>H<sub>5</sub>CHO<sub>2</sub>CO<sub>3</sub>H excluded    ◆ Meas.

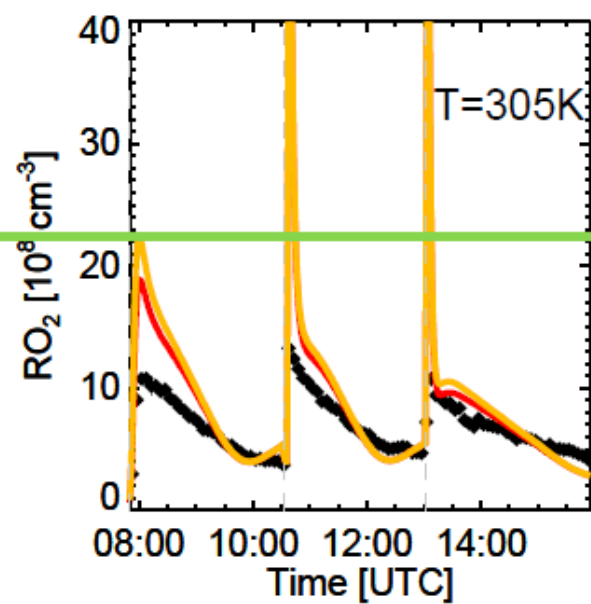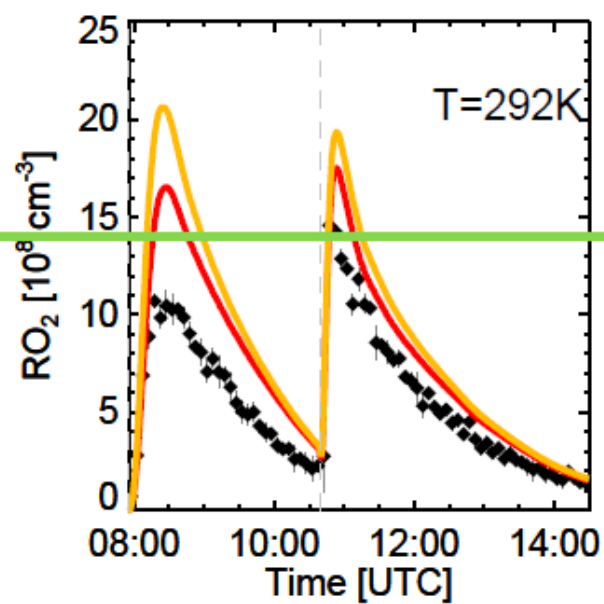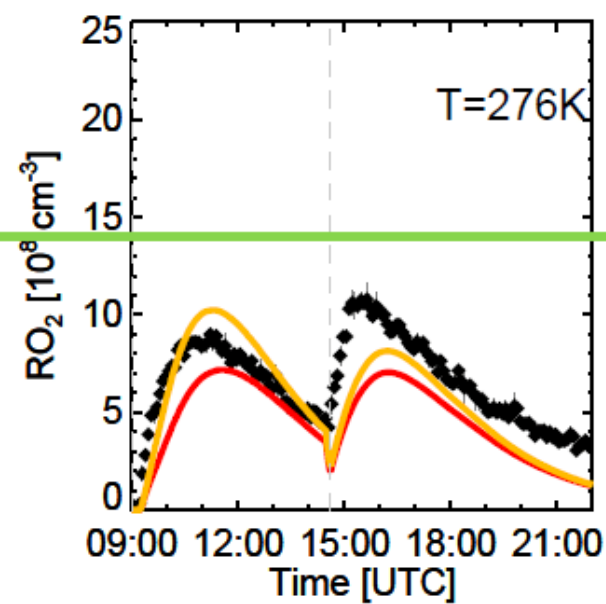

Supplement: d3cp04163h1.zip [file d3cp04163h1.zip]

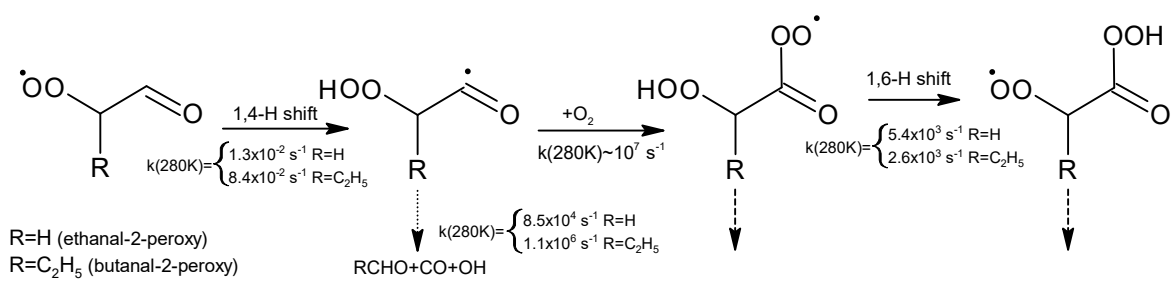

Supplement: d3cp04163h1.zip [file d3cp04163h1.zip]

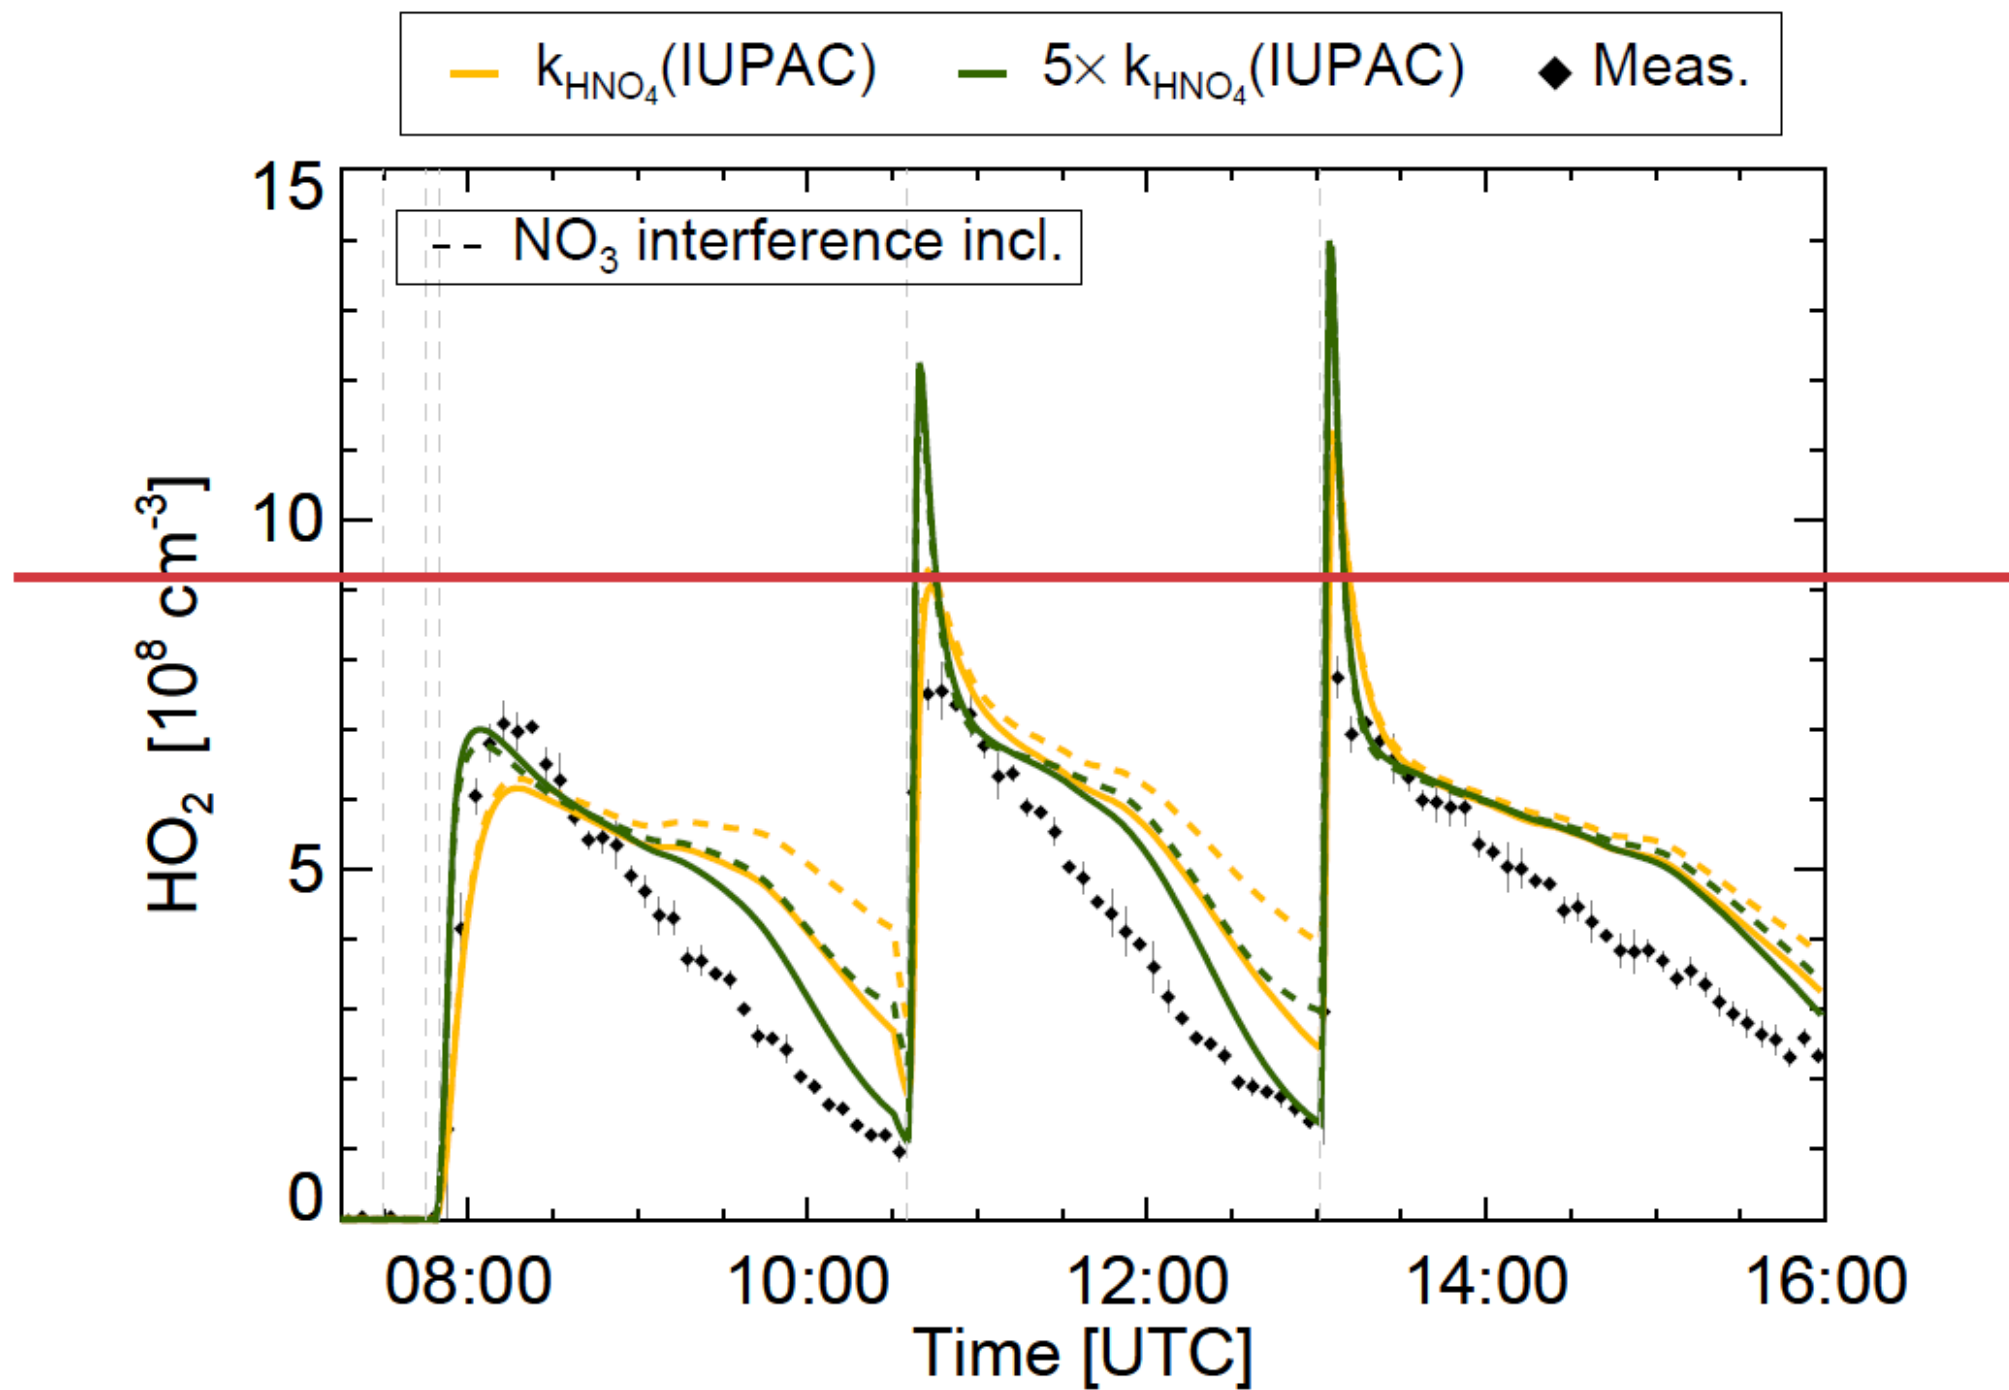

Supplement: d3cp04163h1.zip [file d3cp04163h1.zip]

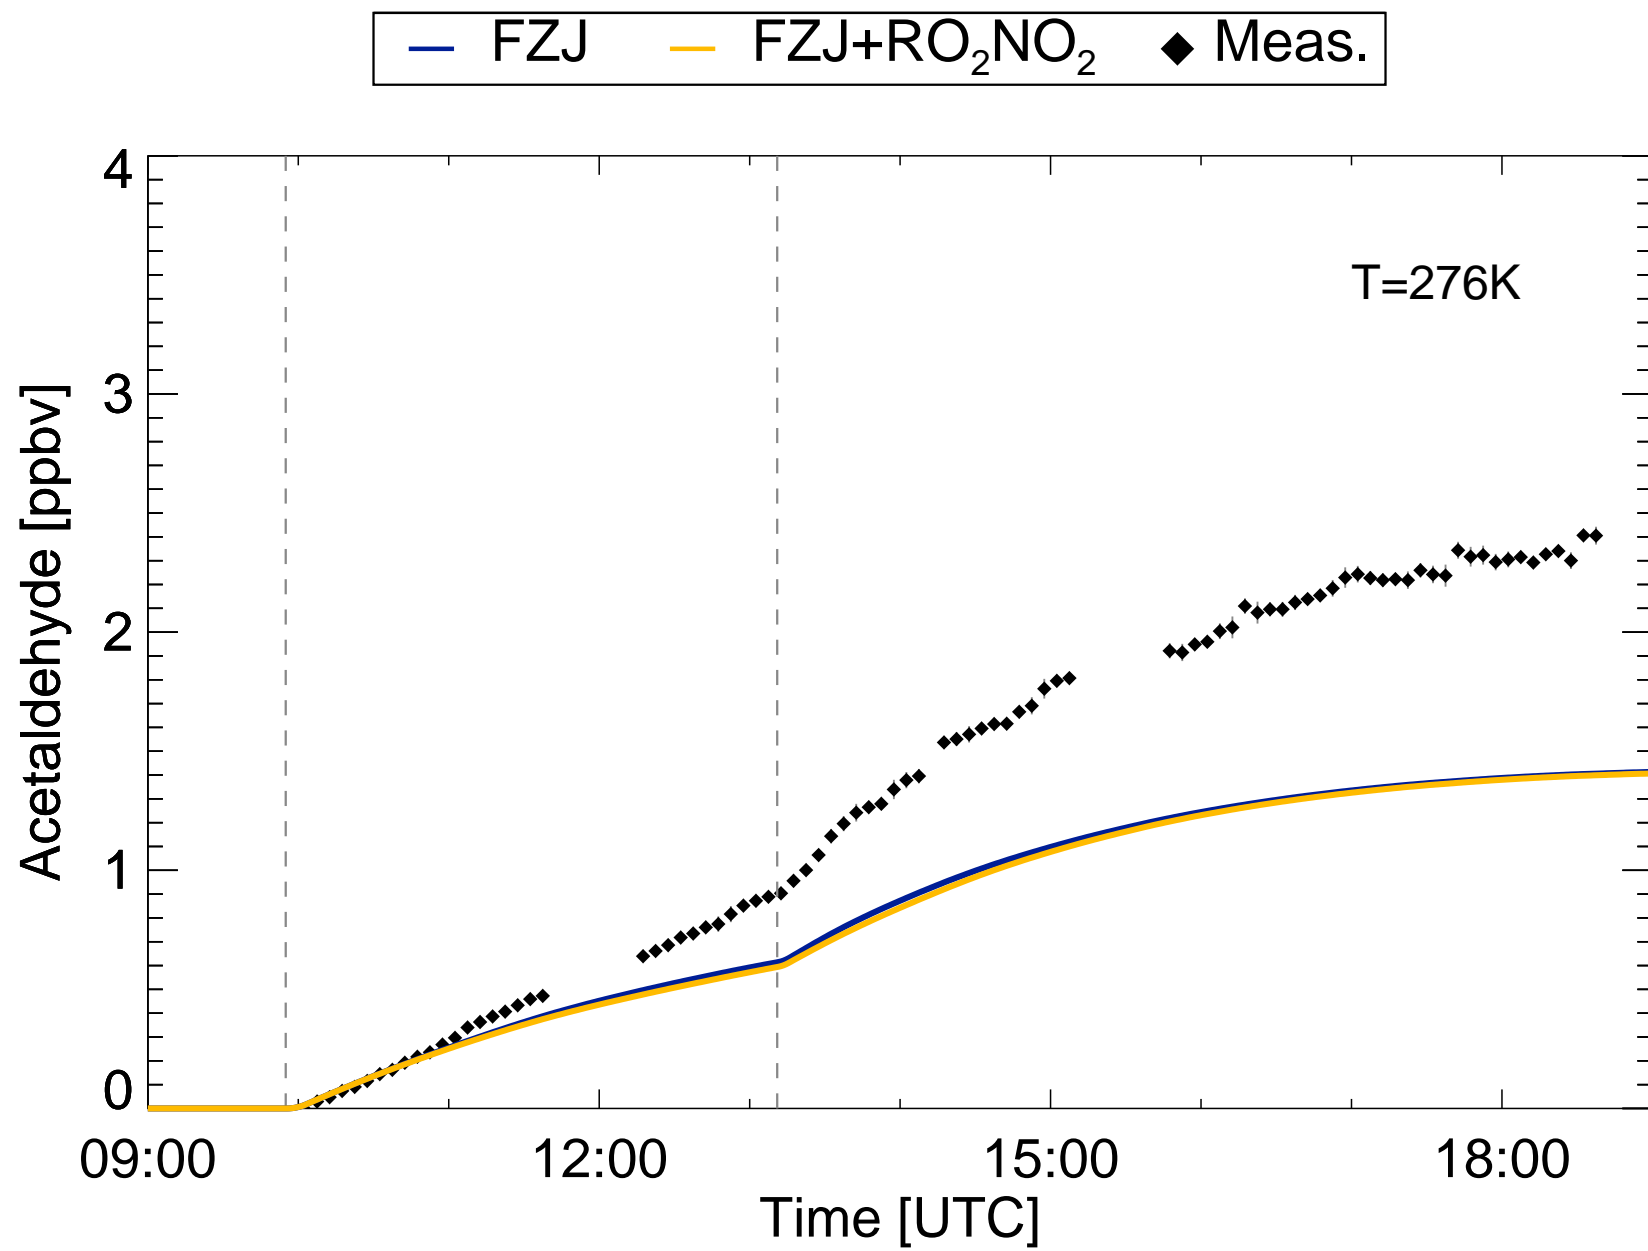

Supplement: d3cp04163h1.zip [file d3cp04163h1.zip]

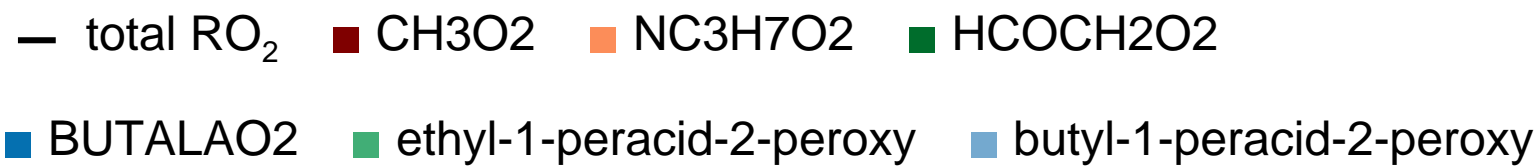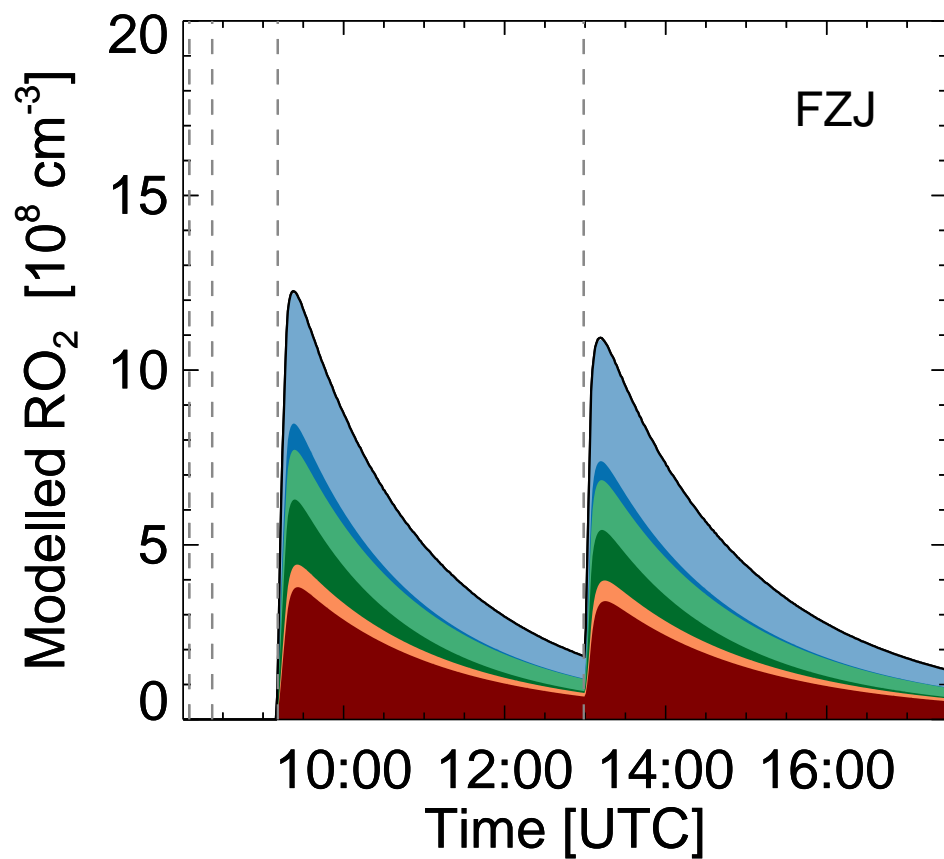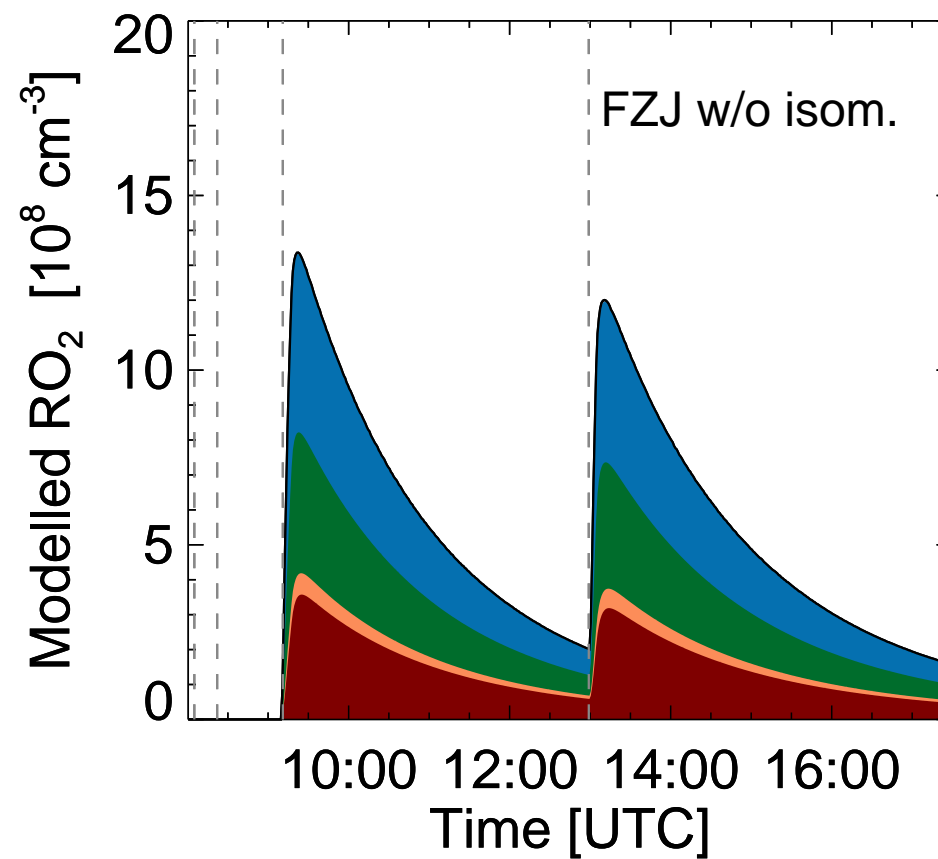

Supplement: d3cp04163h1.zip [file d3cp04163h1.zip]

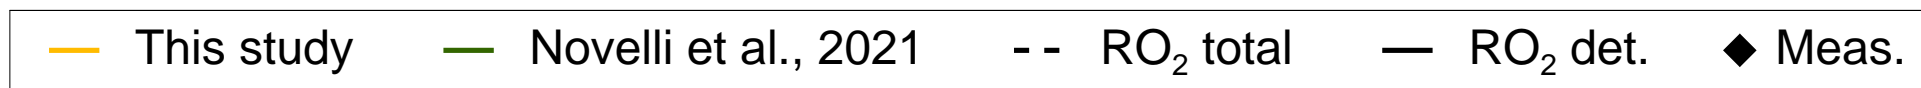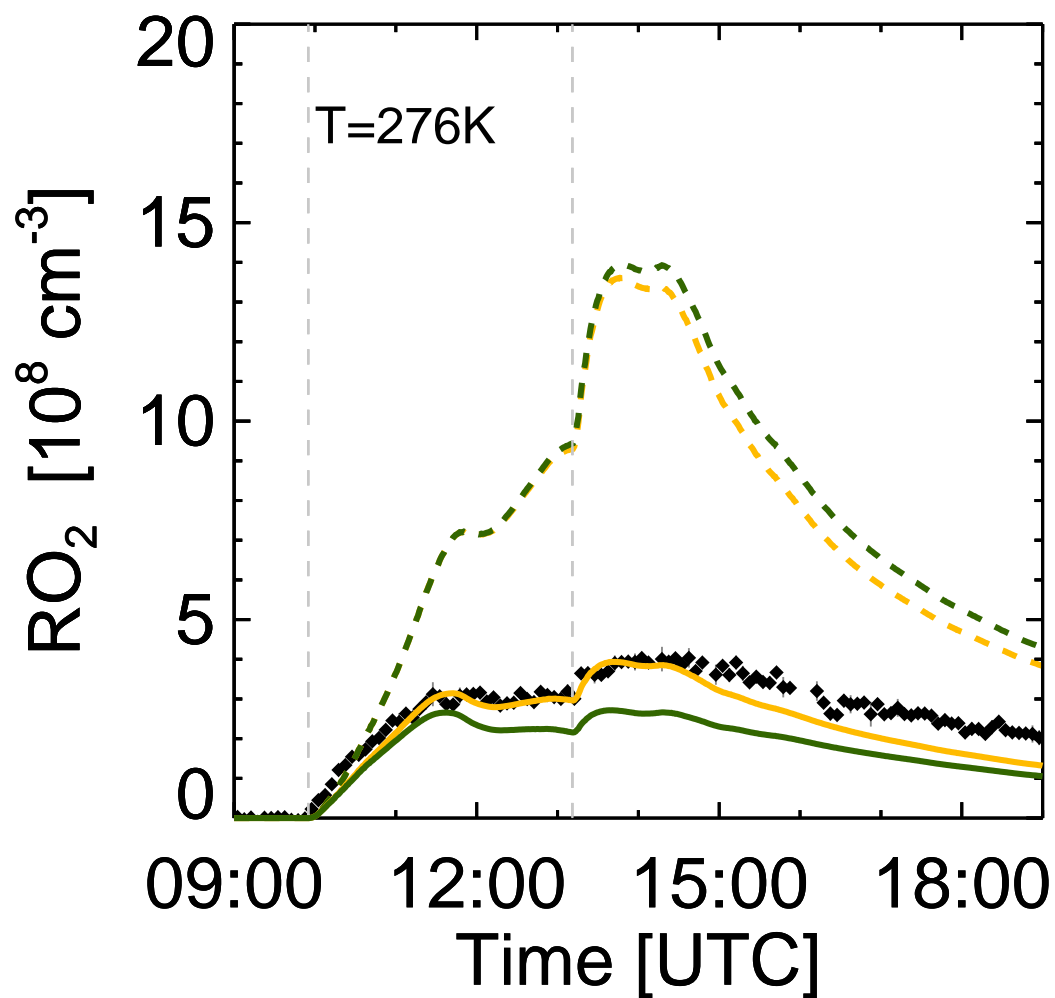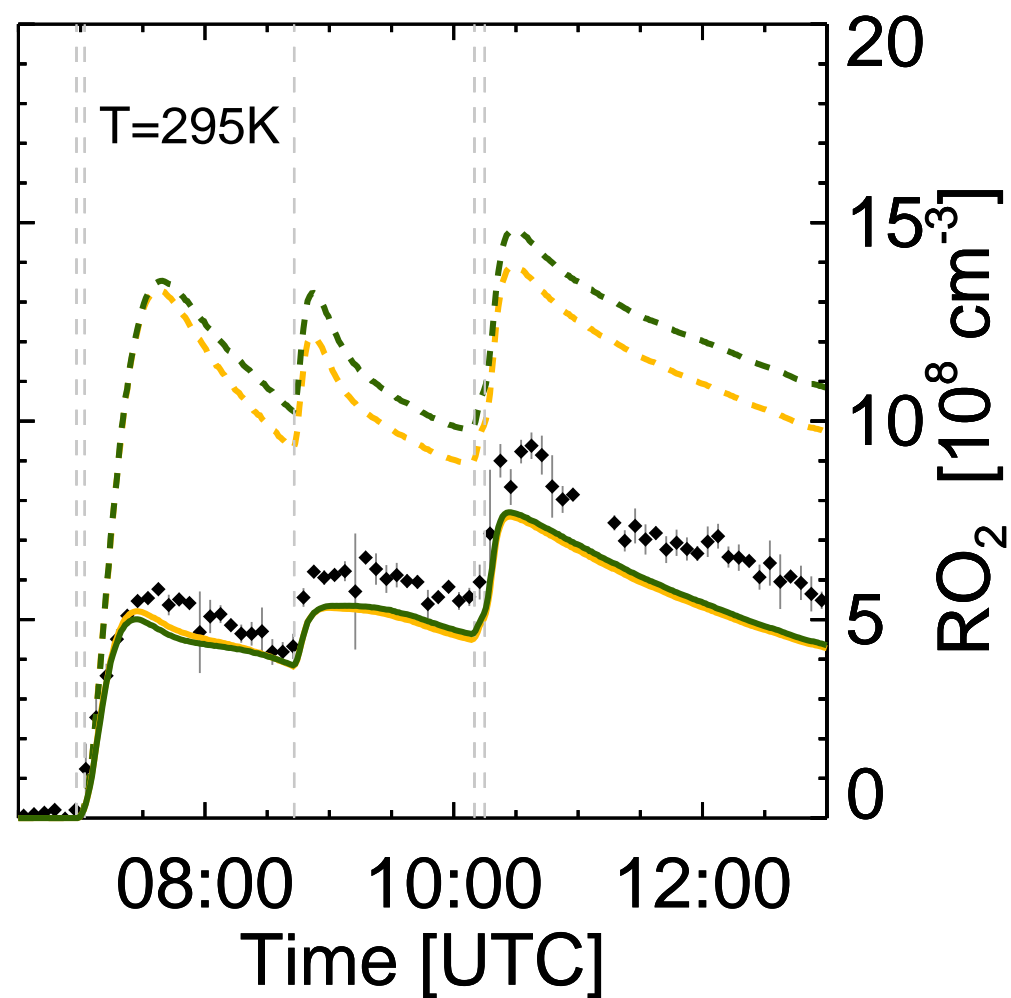

Supplement: d3cp04163h1.zip [file d3cp04163h1.zip]

# Trans-2-hexene (a) T=305K

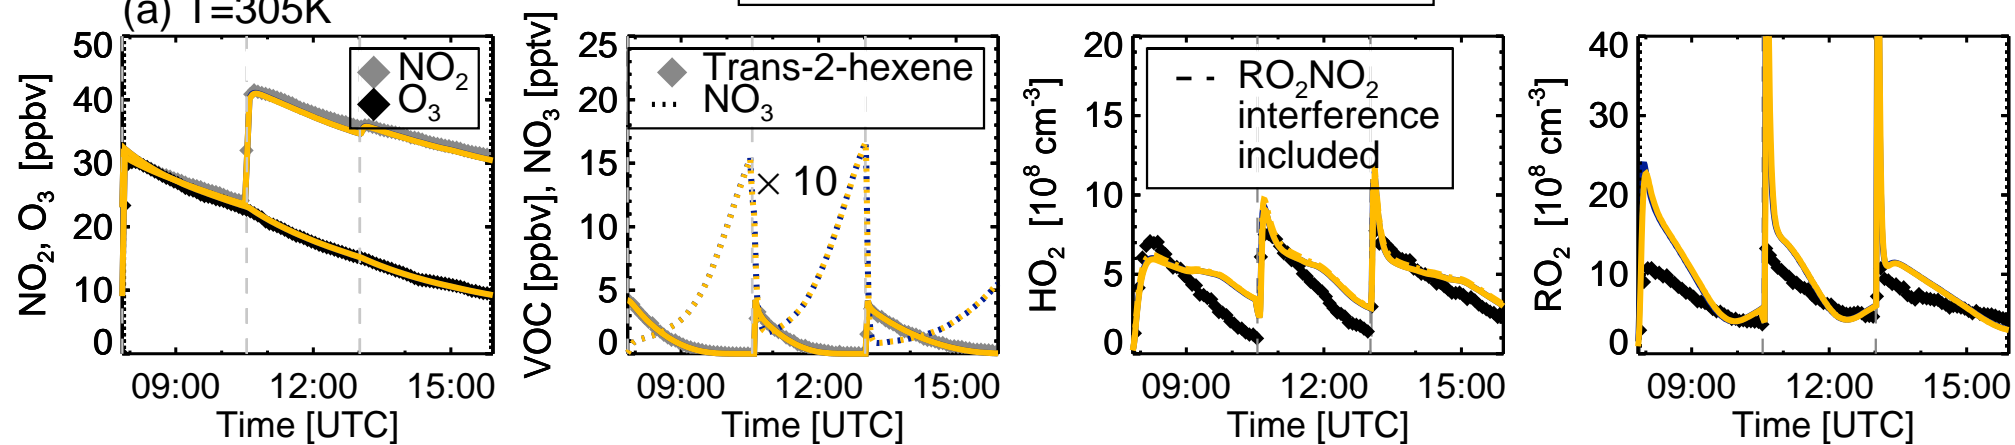

# (b) T=292K

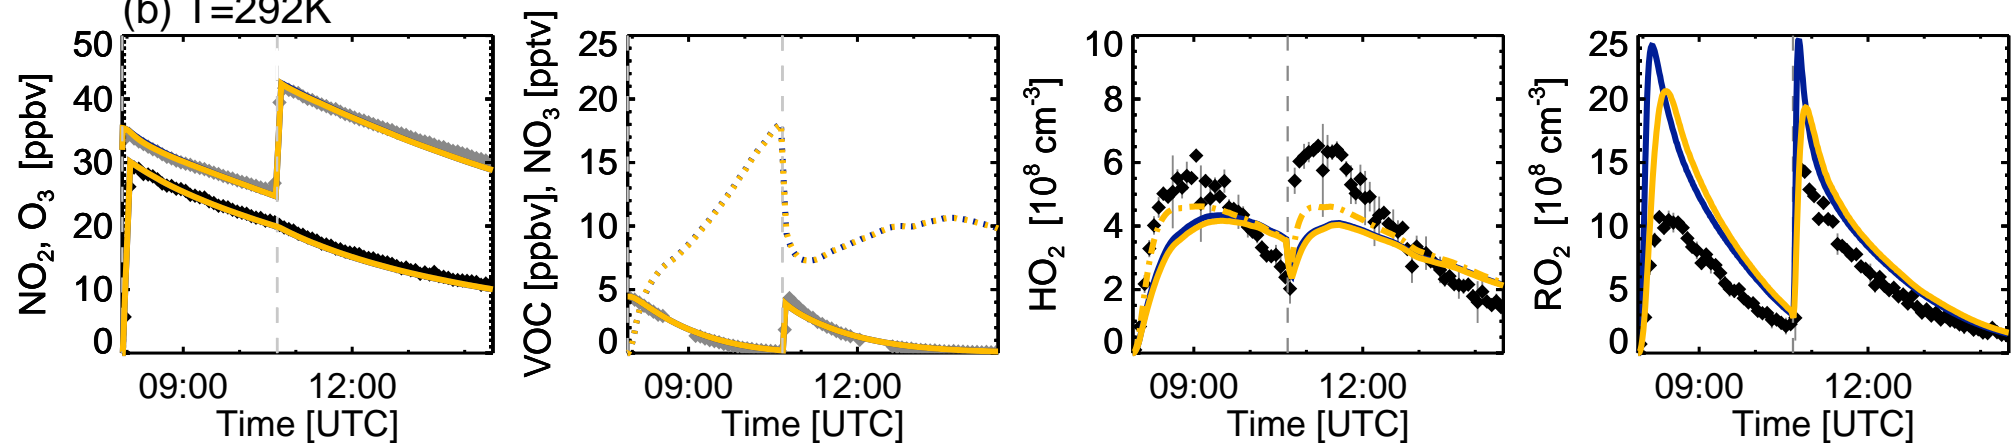

Supplement: d3cp04163h1.zip [file d3cp04163h1.zip]

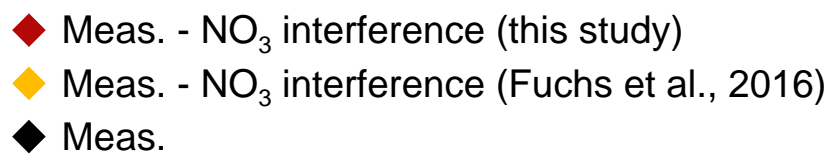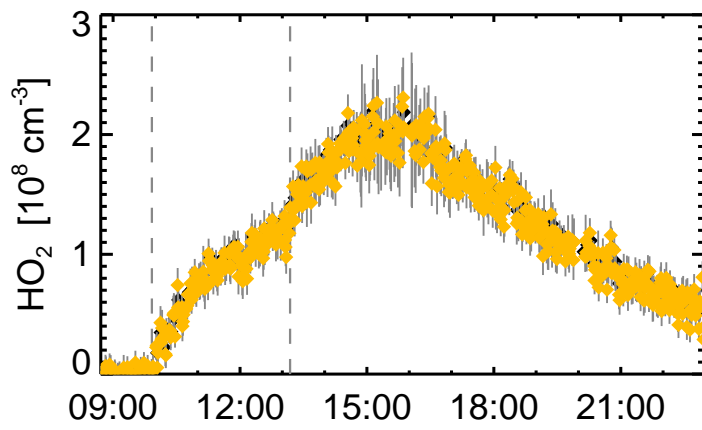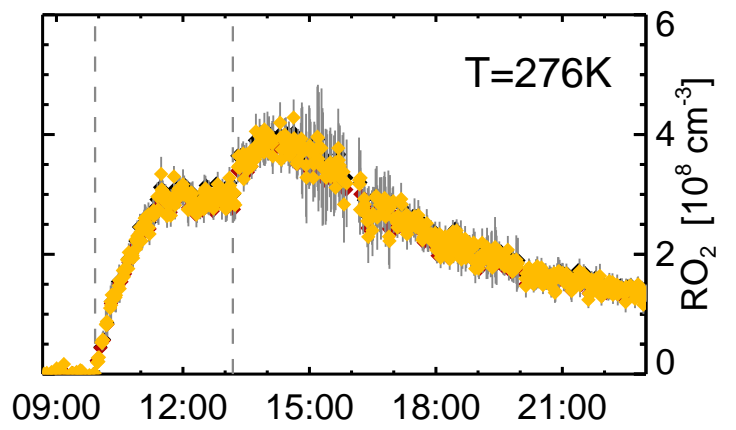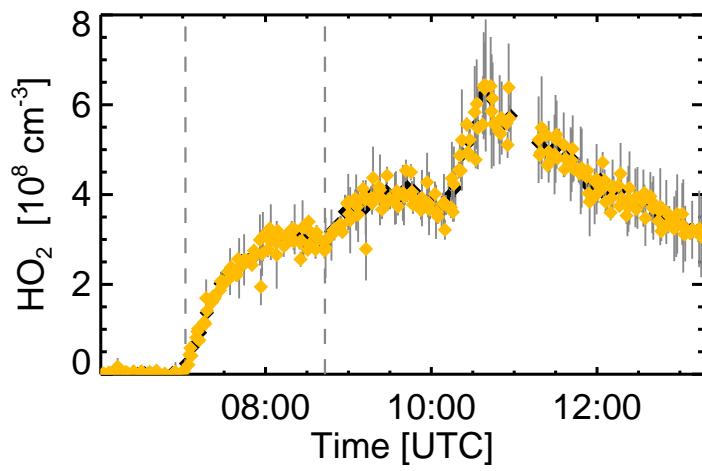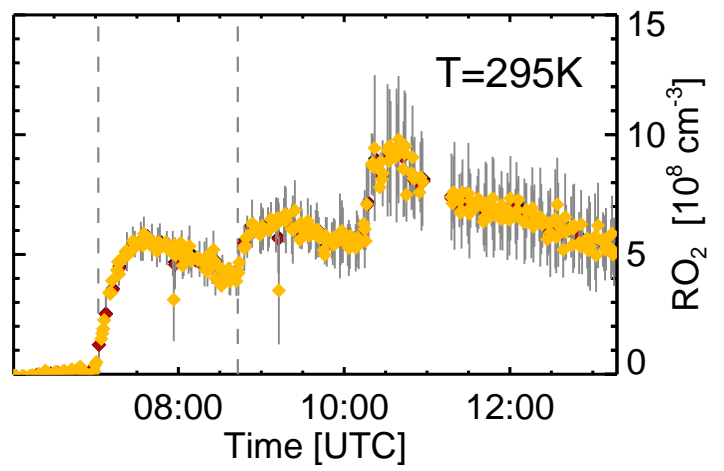

Supplement: d3cp04163h1.zip [file d3cp04163h1.zip]

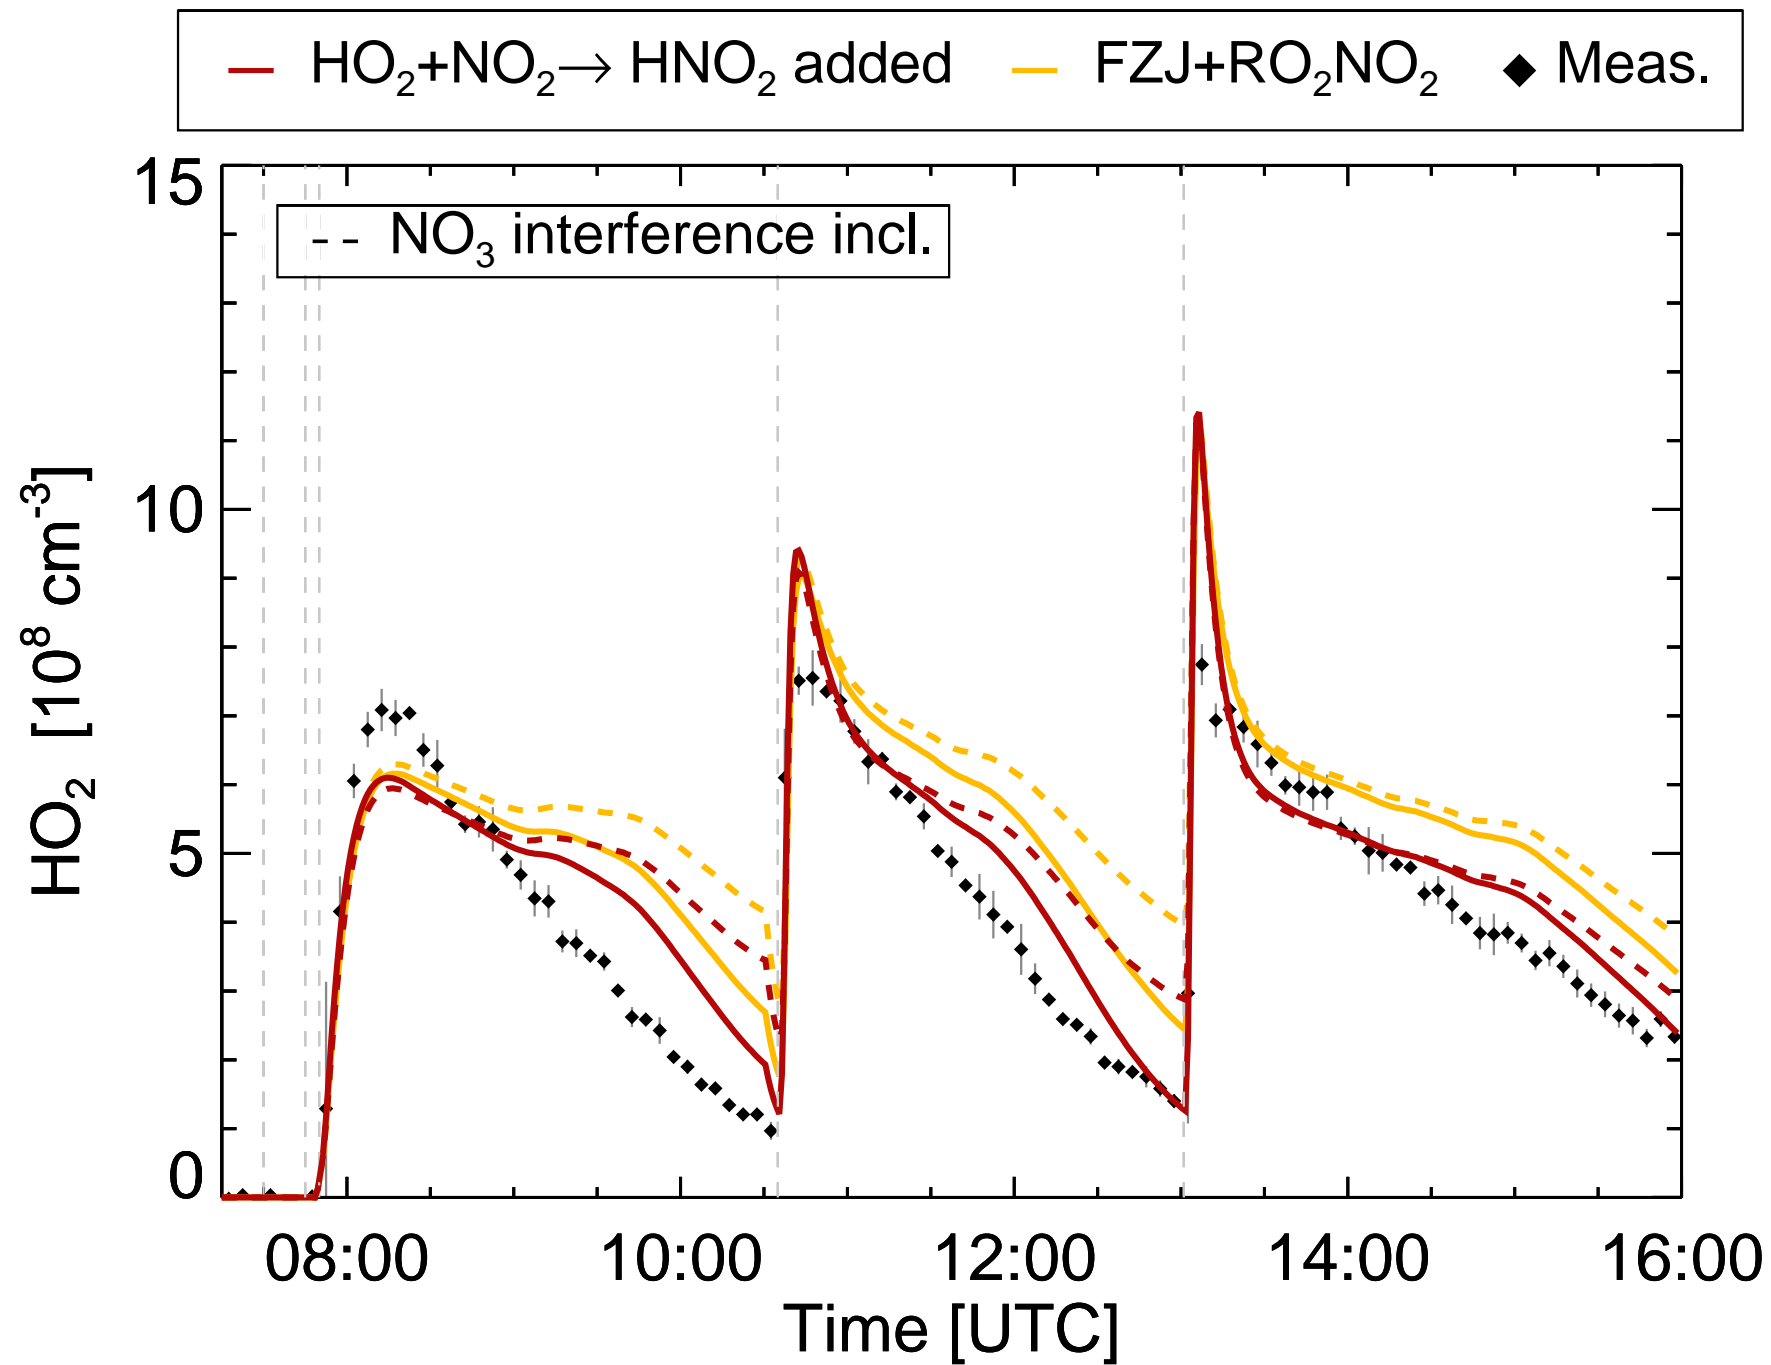

Supplement: d3cp04163h1.zip [file d3cp04163h1.zip]

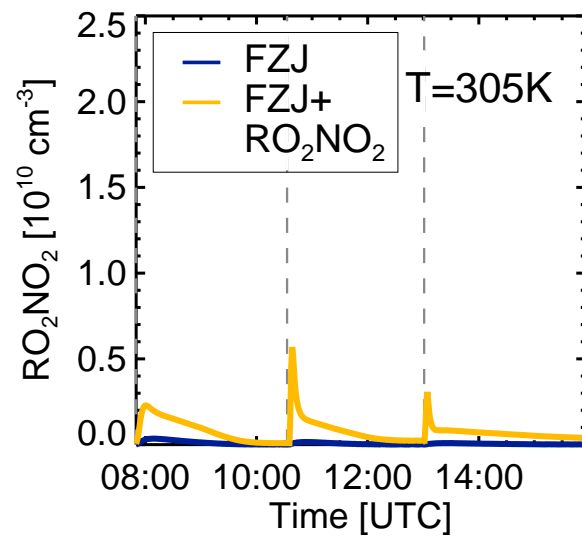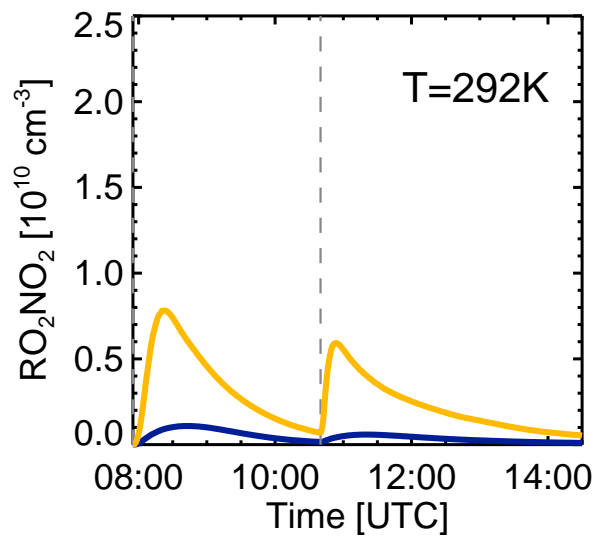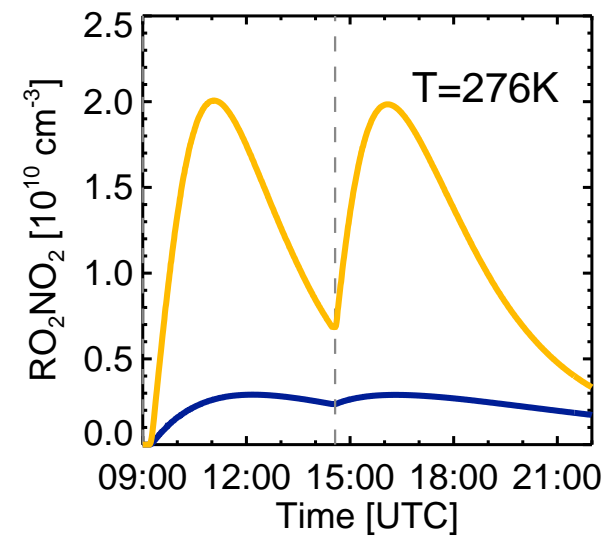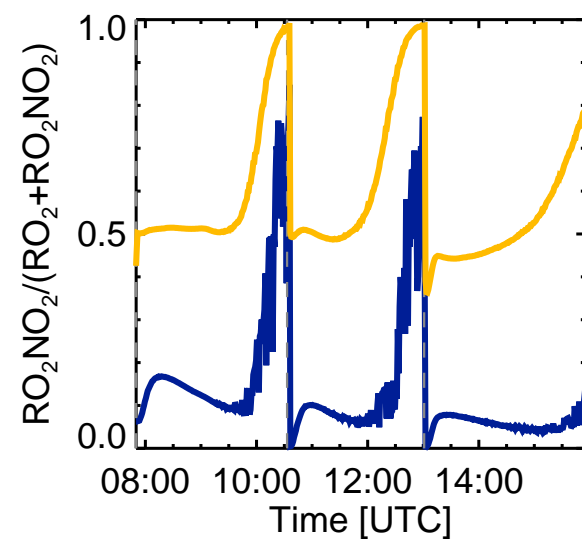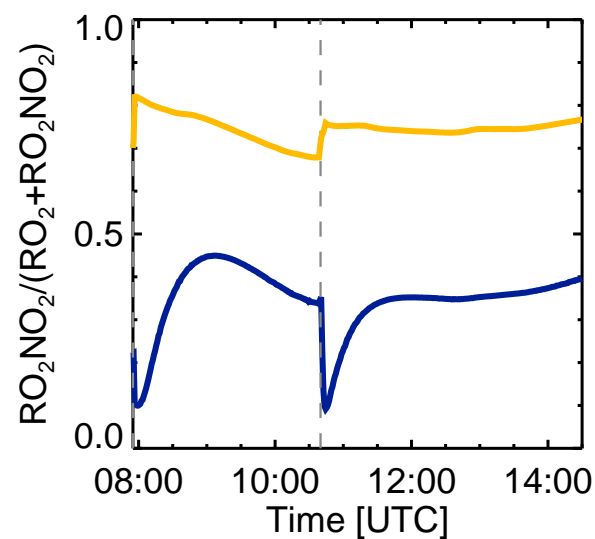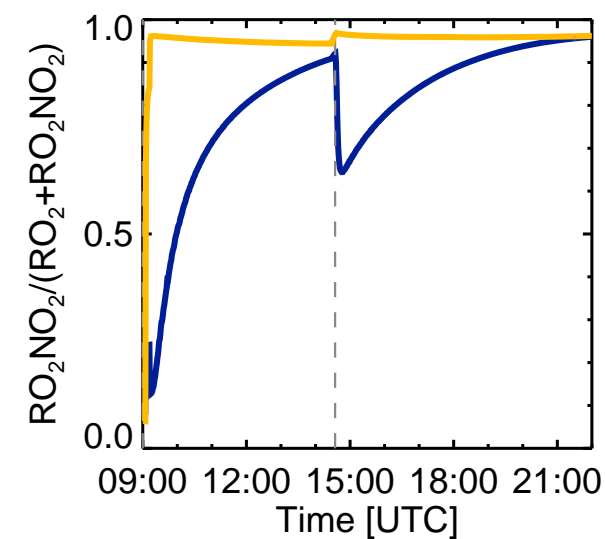

Supplement: d3cp04163h1.zip [file d3cp04163h1.zip]

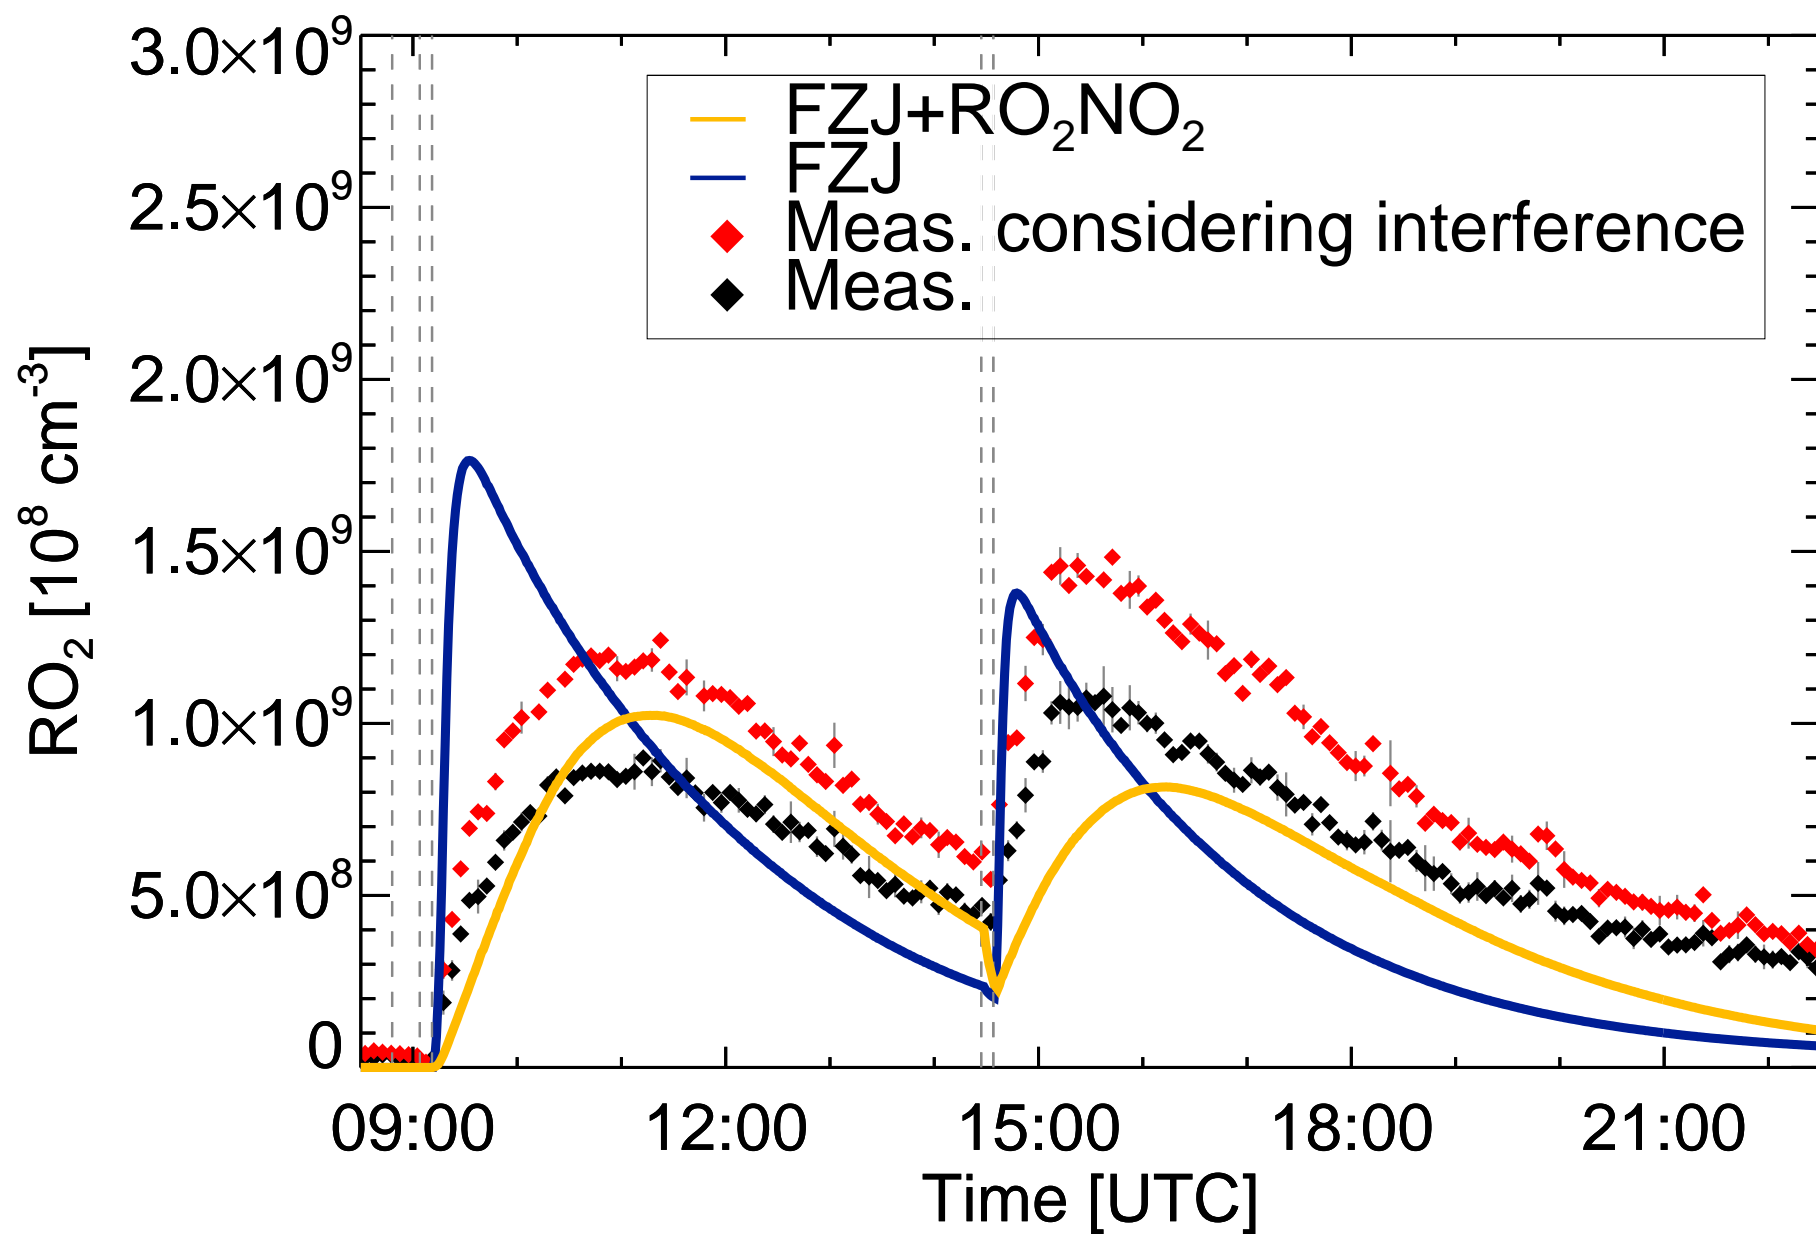

Supplement: d3cp04163h1.zip [file d3cp04163h1.zip]

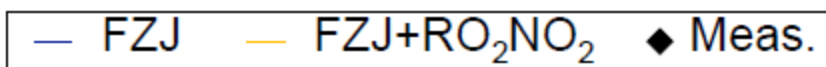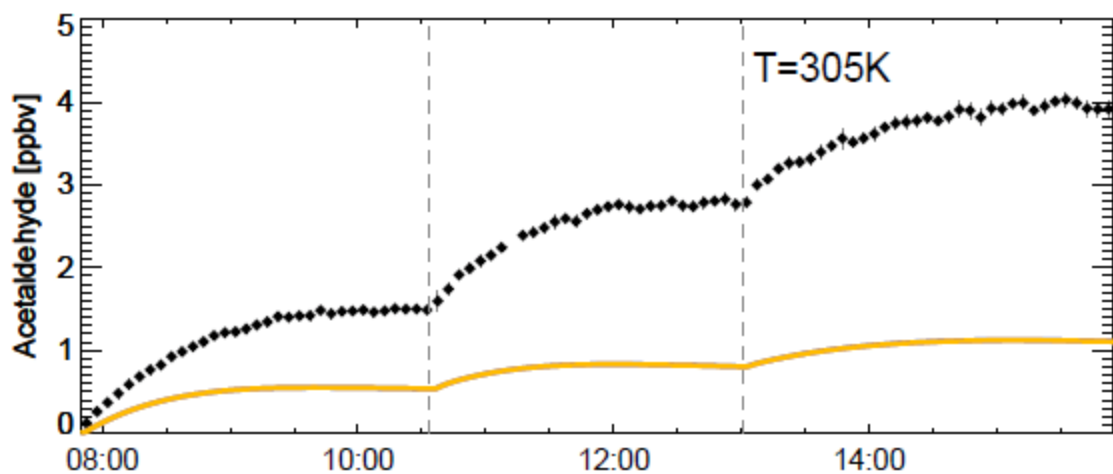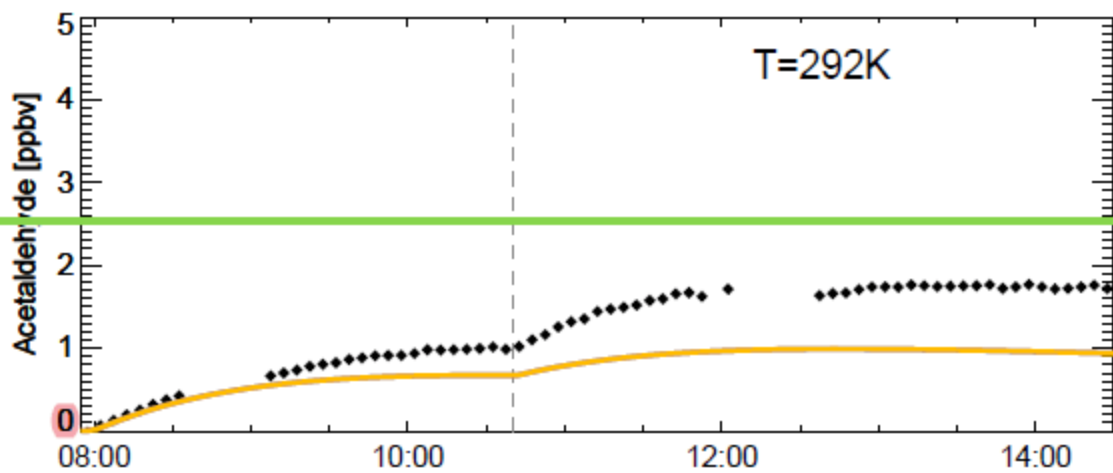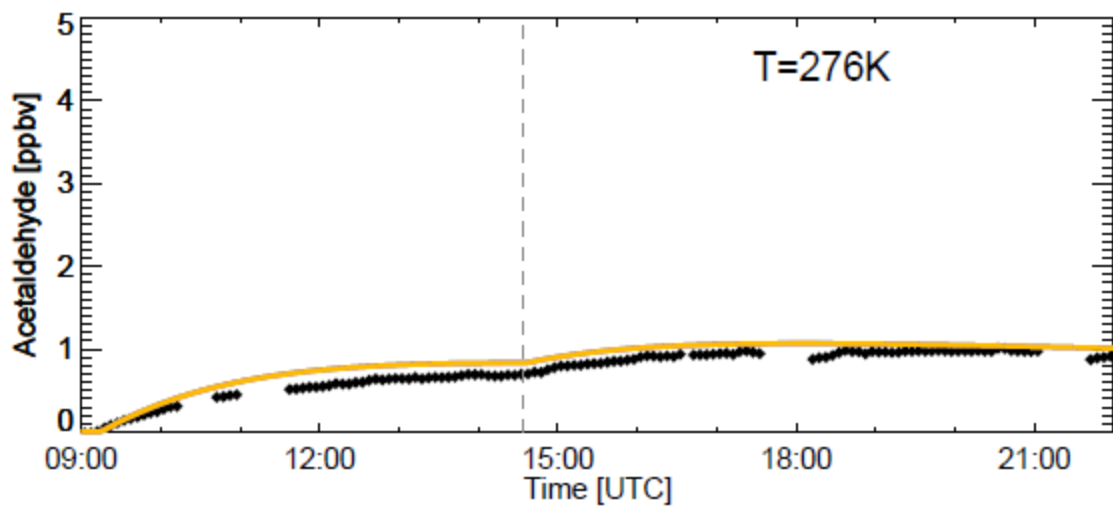

Supplement: d3cp04163h1.zip [file d3cp04163h1.zip]

— Total  $\text{RO}_2$     —  $\text{C}_2\text{H}_5\text{CHO}_2\text{CO}_3\text{H}$  excluded    ◆ Meas.

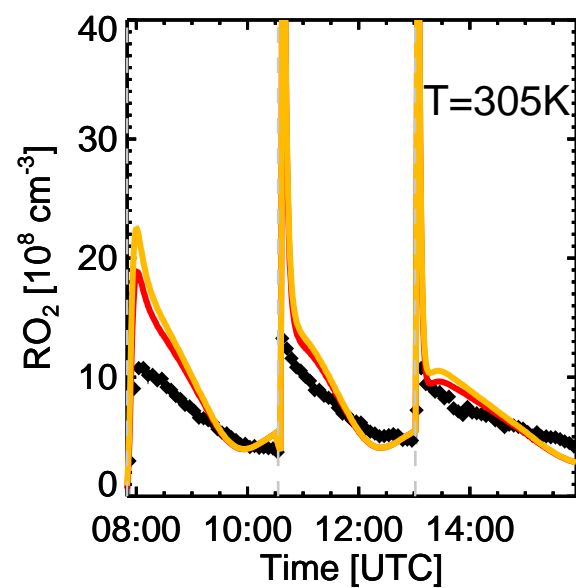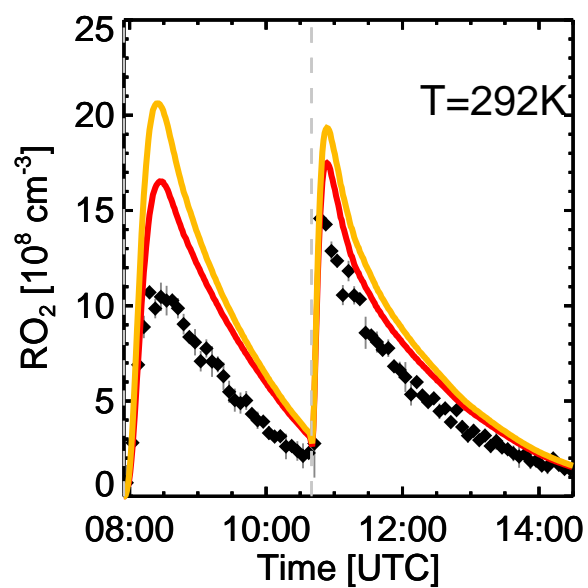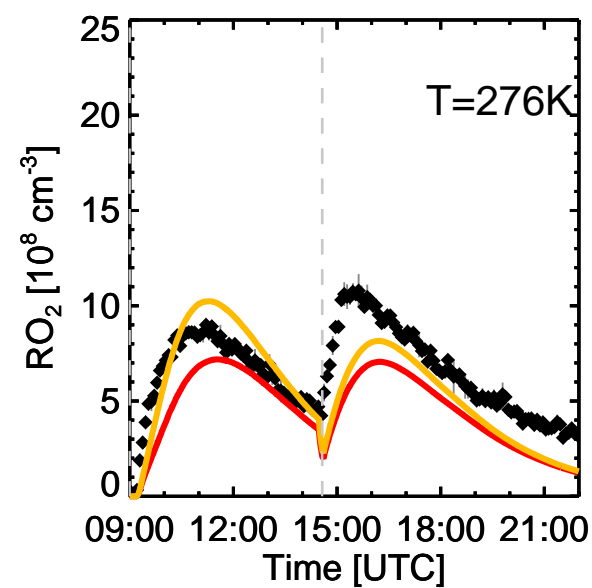

Supplement: d3cp04163h1.zip [file d3cp04163h1.zip]

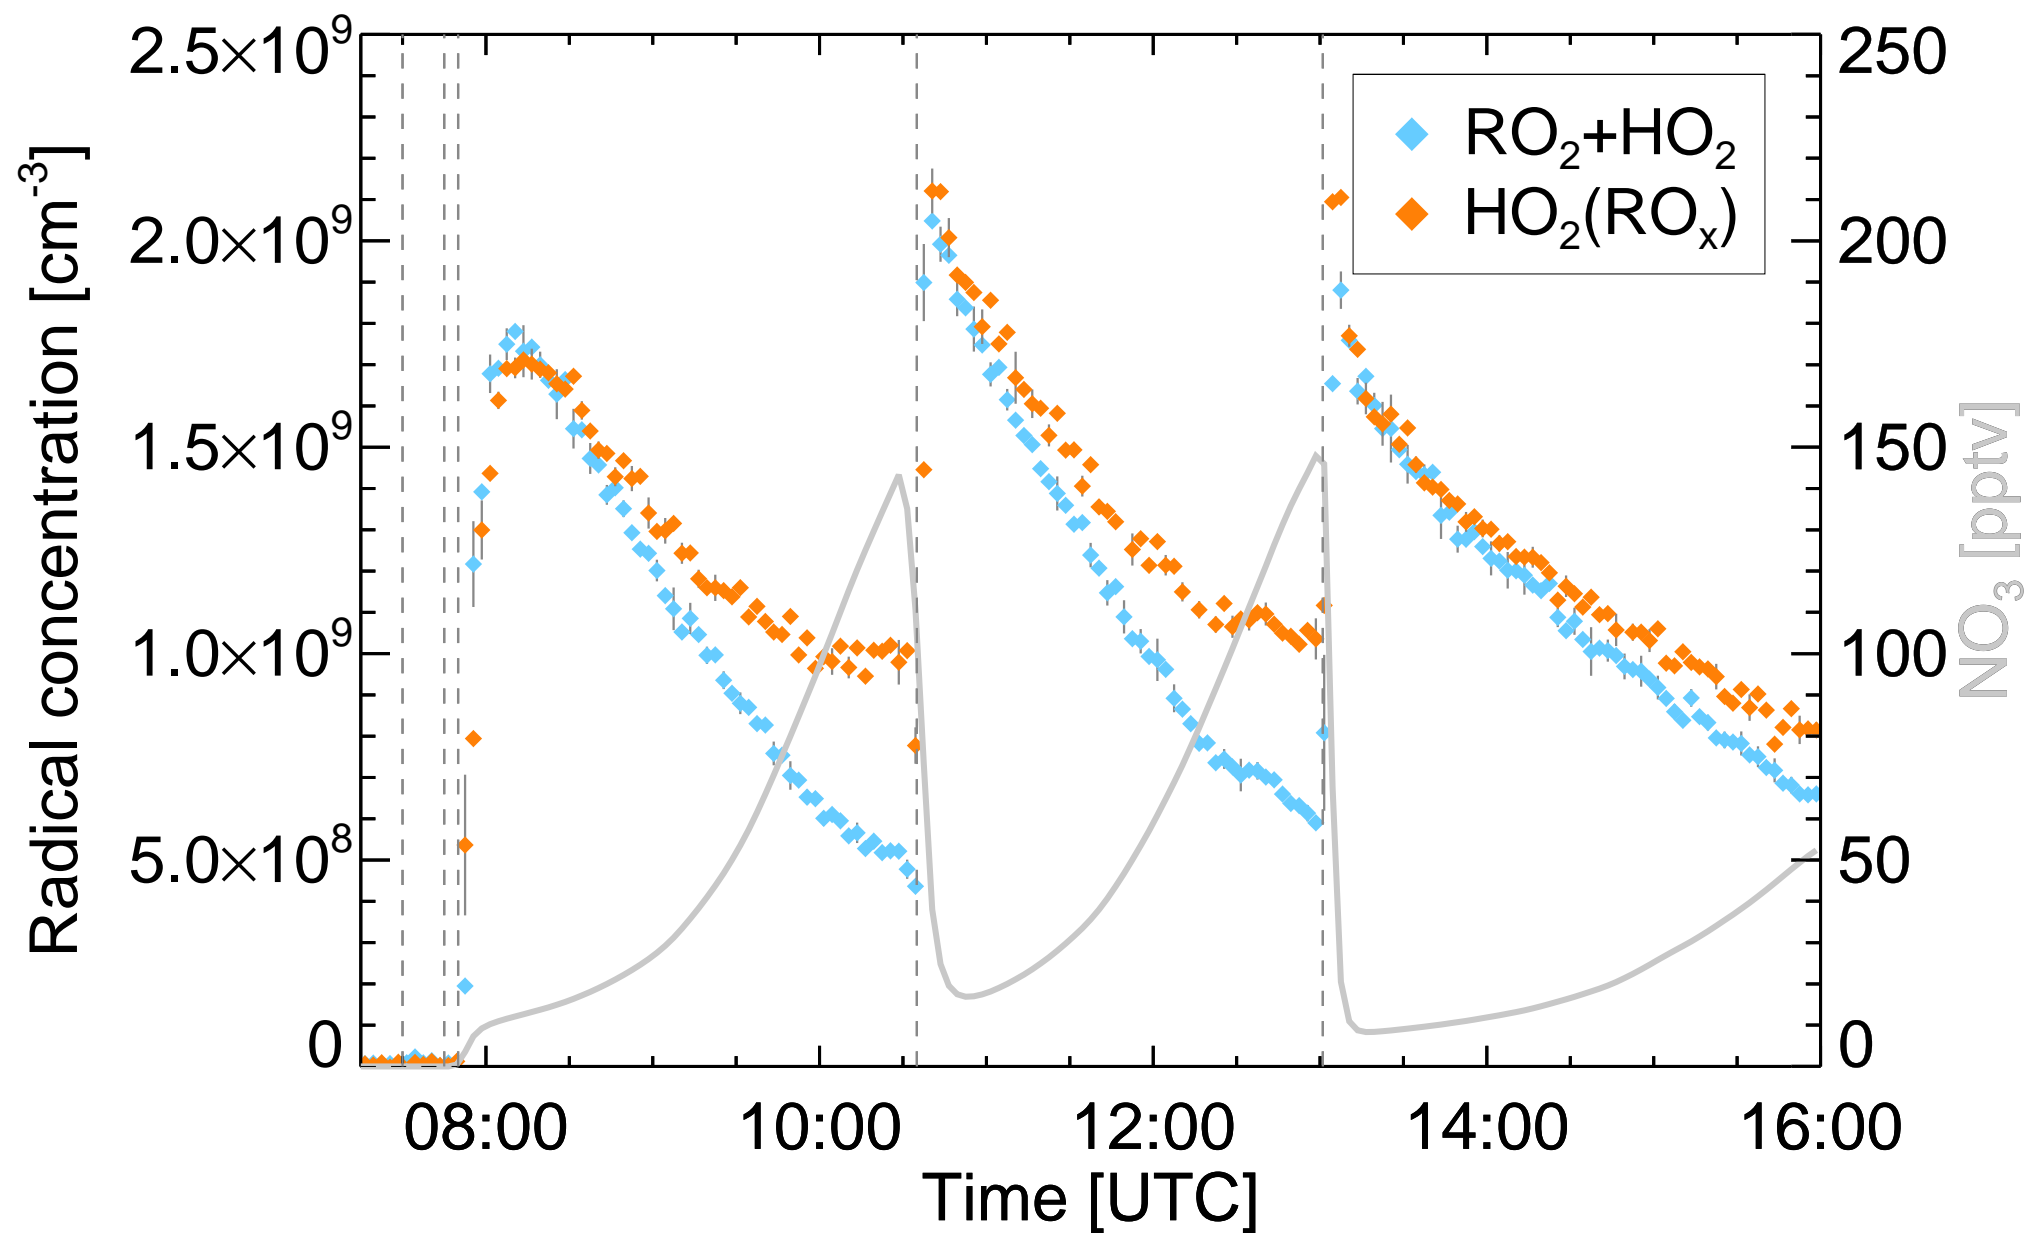

Supplement: d3cp04163h1.zip [file d3cp04163h1.zip]

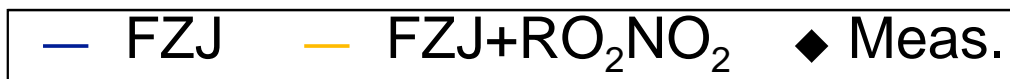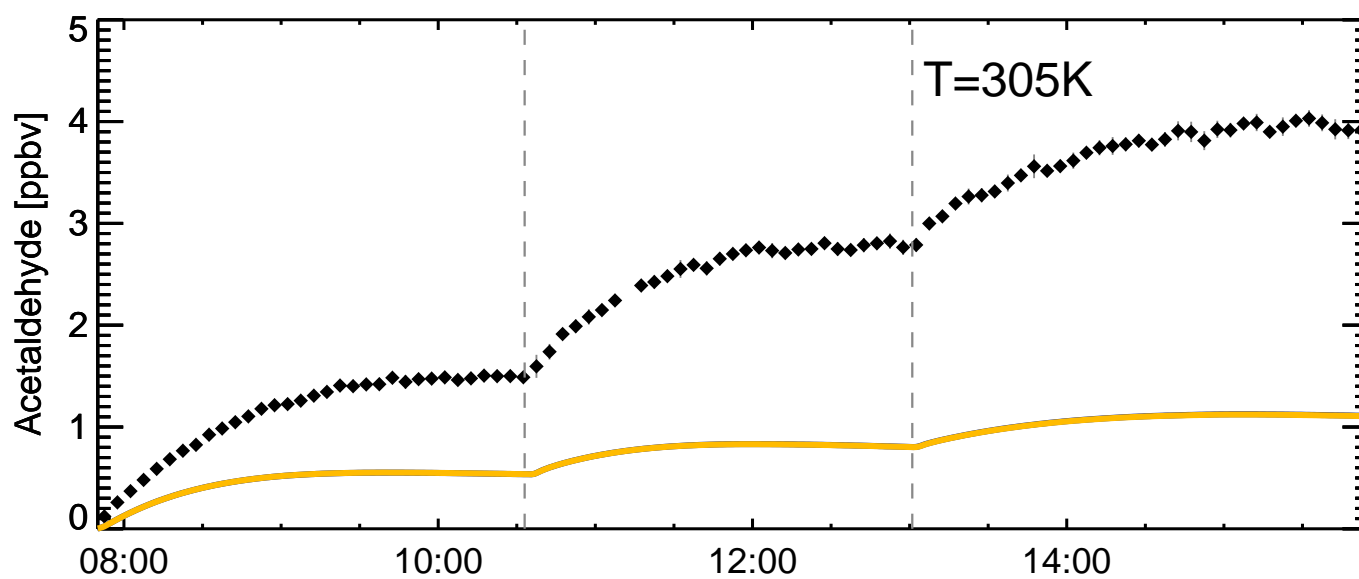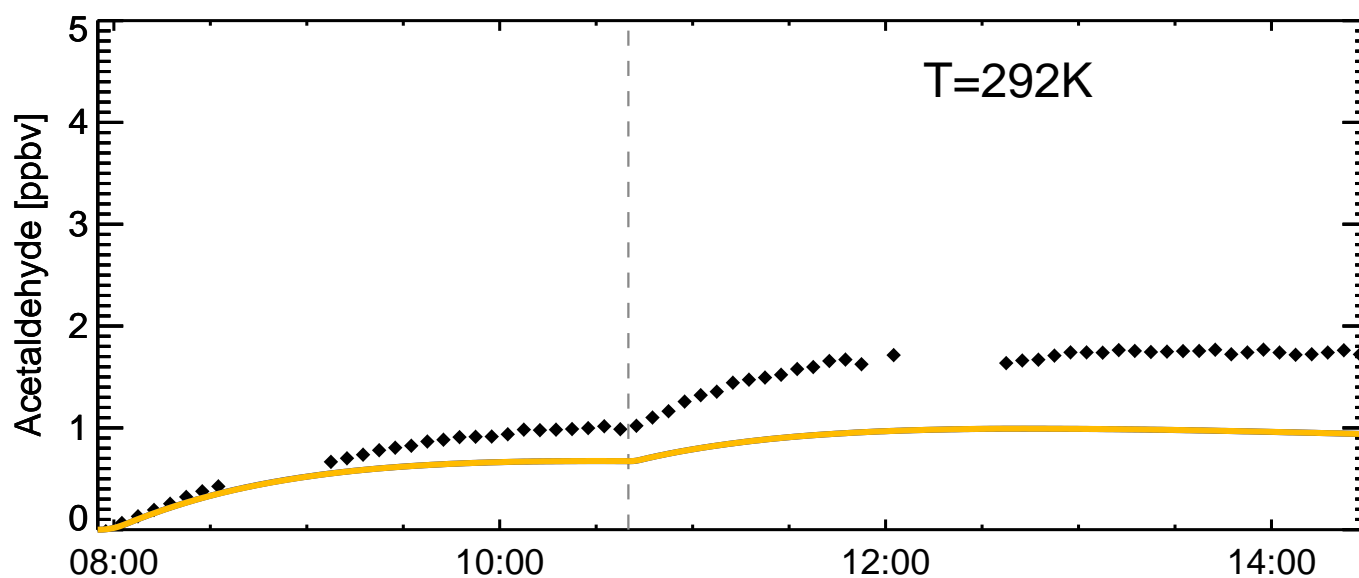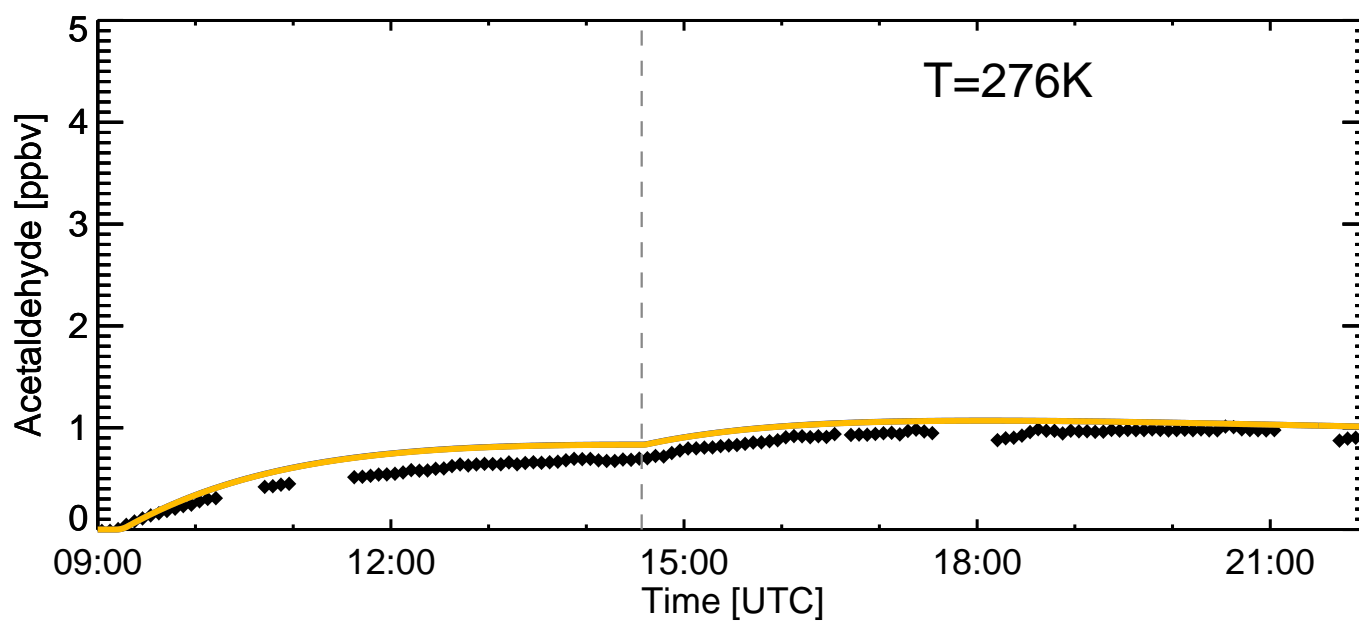

Supplement: d3cp04163h1.zip [file d3cp04163h1.zip]

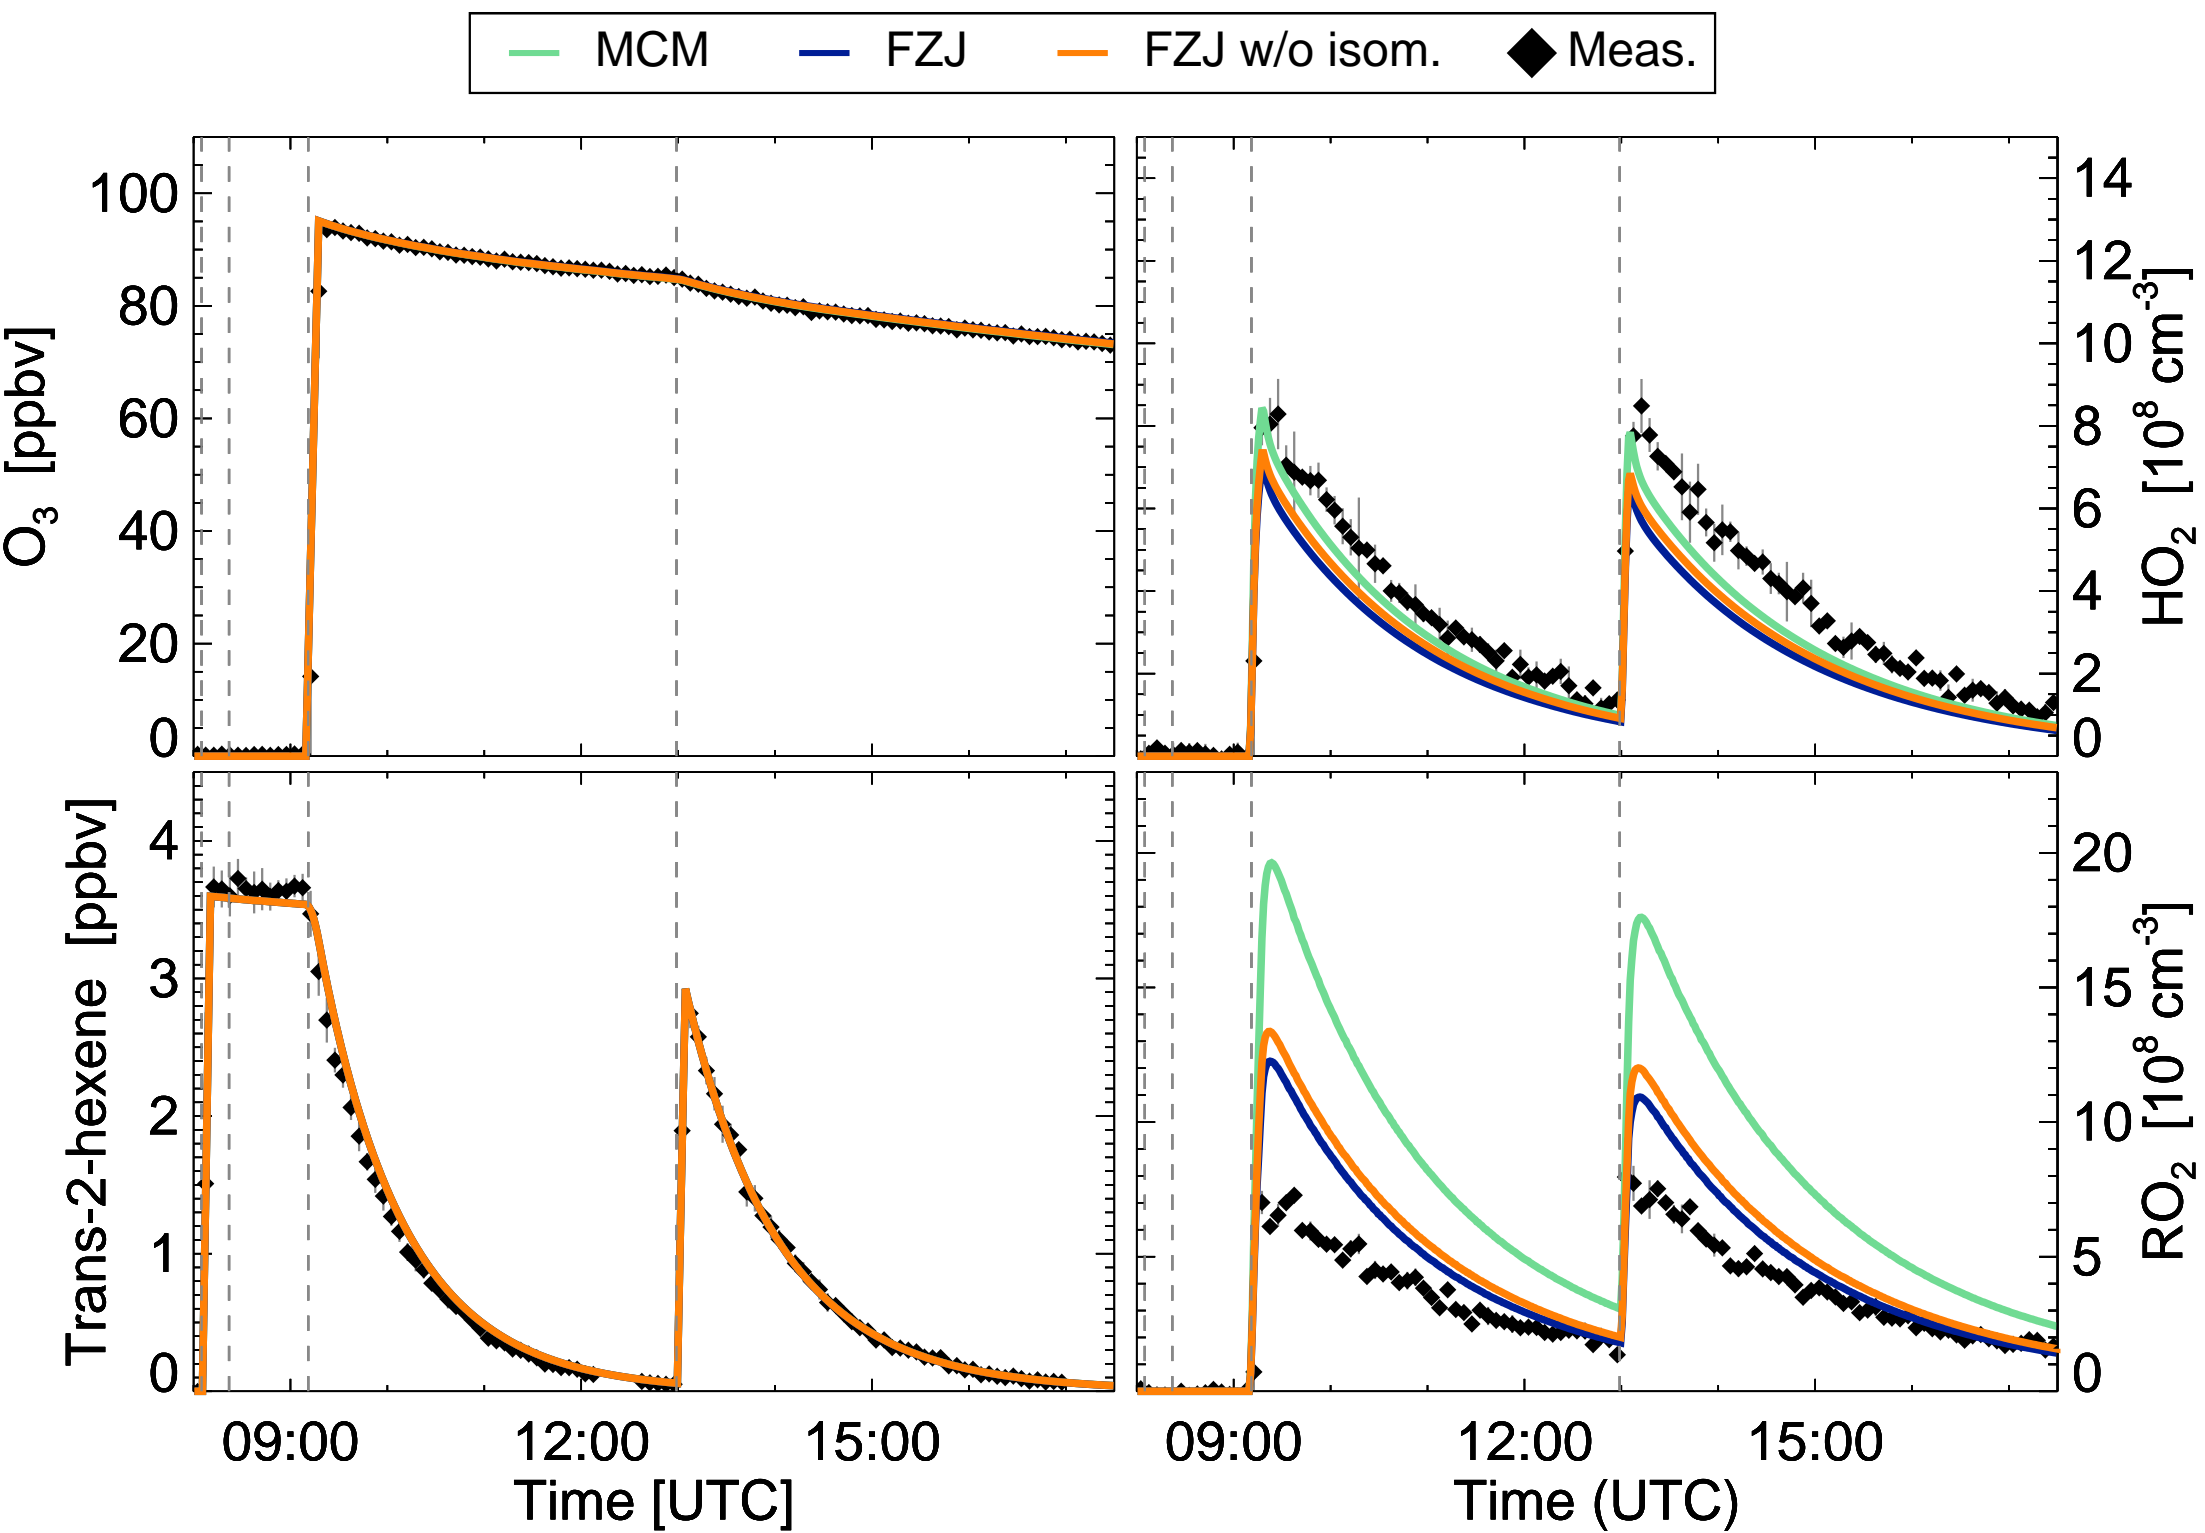

Supplement: d3cp04163h1.zip [file d3cp04163h1.zip]

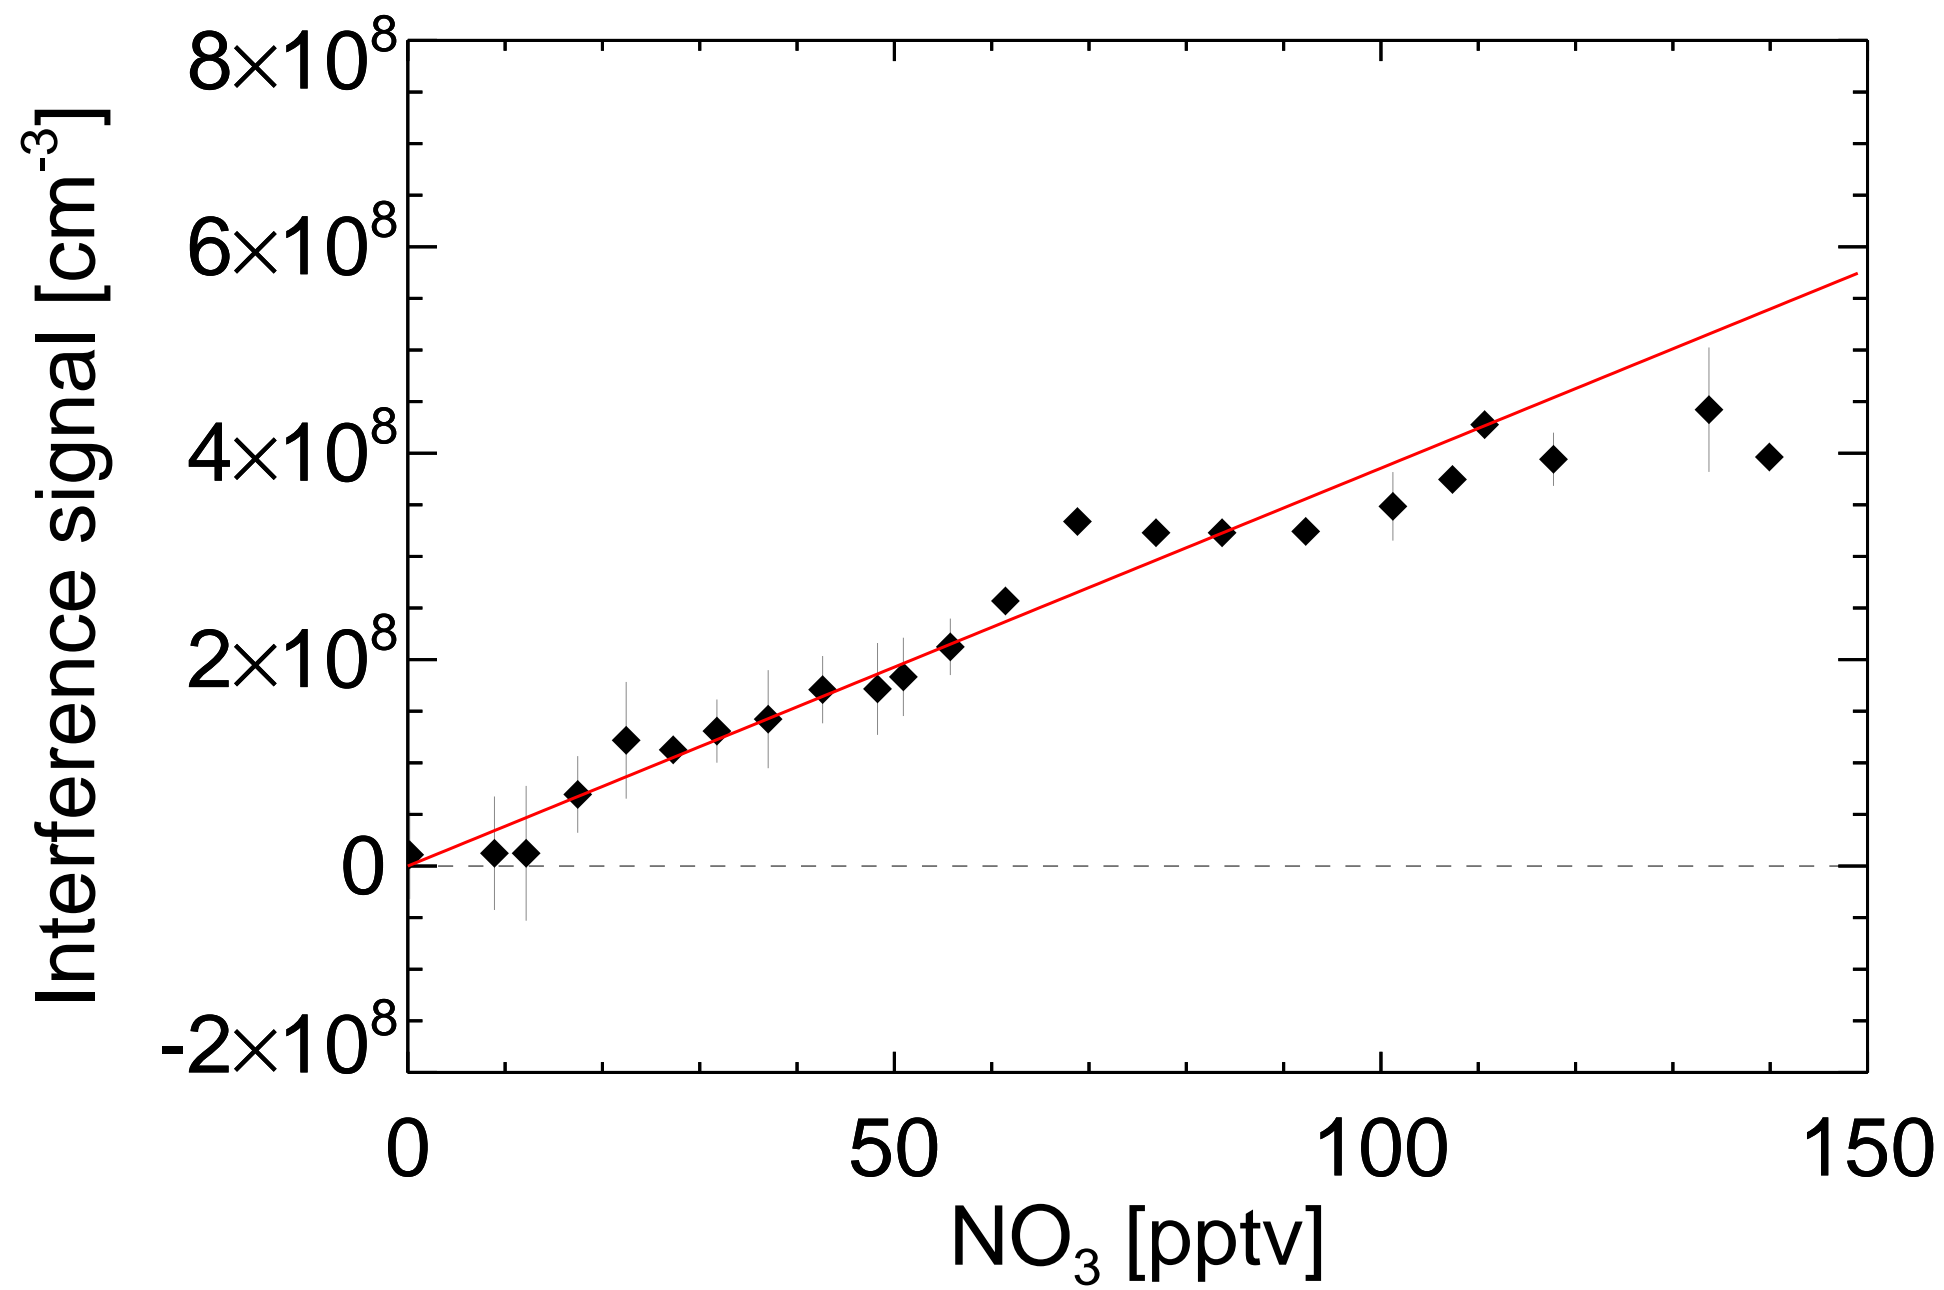

Supplement: d3cp04163h1.zip [file d3cp04163h1.zip]
